# Supplementary material
Source: PubMed Central journal article supplement (PMC10582789)
Supplement: jama-e2318497-s001.pdf [file jama-e2318497-s001.pdf]

## Supplemental Online Content

Juraschek SP, Hu J, Cluett JL, et al. Orthostatic hypotension, hypertension treatment, and cardiovascular disease: an individual participant meta-analysis. *JAMA*. Published online October 17, 2023. doi:10.1001/jama.2023.18497

**eAppendix.** Details of search strategies

**eFigure 1.** PRISMA diagram of the updated systematic review

**eFigure 2.** Updated meta-analysis of the effects of hypertension treatment on orthostatic hypotension.

**eFigure 3.** Cumulative incidence of cardiovascular disease or all-cause mortality by treatment assignment and orthostatic hypotension status

**eFigure 4.** Cumulative incidence of cardiovascular disease or all-cause mortality by treatment assignment and standing hypotension status

**eFigure 5.** Restricted cubic spline of difference in diastolic blood pressure or standing blood pressure

**eFigure 6.** Fully adjusted splines of difference in systolic blood pressure or standing blood pressure

**eFigure 7.** Fully adjusted splines of difference in diastolic blood pressure or standing blood pressure

**eFigure 8.** Two-stage meta-analysis, orthostatic hypotension and cardiovascular disease or all-cause mortality

**eFigure 9.** Two-stage meta-analysis, orthostatic hypotension and all-cause mortality

**eFigure 10.** Two-stage meta-analysis, standing hypotension and cardiovascular disease or all-cause mortality

**eFigure 11.** Two-stage meta-analysis, standing hypotension and all-cause mortality

**eTable 1.** Comparison of covariate definitions across blood pressure treatment goal trials

**eTable 2.** Comparison of covariate definitions across placebo-controlled trials

**eTable 3.** Participant characteristics for all trials, trials of blood pressure treatment goal, and placebo-controlled trials

**eTable 4.** Cross-tabulation of orthostatic hypotension and standing hypotension

**eTable 5.** Baseline characteristics of each blood pressure treatment goal trial

**eTable 6.** Baseline characteristics of each placebo-controlled trial

**eTable 7.** Number of participants by blood pressure distribution

**eTable 8.** Association of baseline orthostatic hypotension with cardiovascular disease or all-cause mortality

**eTable 9.** Association of baseline standing hypotension with cardiovascular disease or all-cause mortality

**eTable 10.** Association of baseline orthostatic hypotension with cardiovascular disease or all-cause mortality adjusted for additional cardiovascular risk factors

**eTable 11.** Association of baseline standing hypotension with cardiovascular disease or all-cause mortality adjusted for additional cardiovascular risk factors

**eTable 12.** Association between orthostatic or standing hypotension and outcomes among those assigned a more intensive blood pressure goal or active treatment

**eTable 13.** Association between orthostatic or standing hypotension and outcomes among those assigned a standard blood pressure goal or placebo

**eTable 14.** Treatment effects on cardiovascular disease or all-cause mortality by baseline orthostatic hypotension, unadjusted

**eTable 15.** Treatment effects on cardiovascular disease or all-cause mortality by baseline standing hypotension, unadjusted

**eTable 16.** Treatment effects on cardiovascular disease or all-cause mortality by baseline orthostatic hypotension, adjusted for additional cardiovascular risk factors

**eTable 17.** Treatment effects on cardiovascular disease or all-cause mortality by baseline standing hypotension, adjusted for additional cardiovascular risk factors

**eTable 18.** Association of baseline orthostatic hypotension with cardiovascular disease or all-cause mortality, using an alternate definition of orthostatic hypotension based on a drop in systolic blood pressure of at least 30 mm Hg or a drop in diastolic blood pressure of at least 10 mm Hg

**eTable 19.** Treatment effects on cardiovascular disease or all-cause mortality by baseline orthostatic hypotension, using an alternate definition of orthostatic hypotension based on a drop in systolic blood pressure of at least 30 mm Hg or a drop in diastolic blood pressure of at least 10 mm Hg

**eTable 20.** Treatment effects on cardiovascular disease or all-cause mortality by baseline standing hypotension, defined using distinct thresholds for systolic or diastolic blood pressure

**eTable 21.** Treatment effects among participants with baseline orthostatic hypotension or baseline standing hypotension in strata of baseline characteristics

This supplemental material has been provided by the authors to give readers additional information about their work.

## eAppendix. Details of search strategies

### PUBMED SEARCH:

Hypertension, Orthostatic Hypotension (RCTs / mortality)

Search update May 13, 2022

Medline / PubMed (National Library of Medicine, NCBI)

("Hypertension"[Mesh:NoExp] OR "Essential Hypertension"[Mesh] OR "Prehypertension"[Mesh] OR hypertension[tiab] OR high blood pressure[tiab] OR prehypertension[tiab])

AND

("Hypertension/drug therapy"[Mesh] OR "Antihypertensive Agents" [Pharmacological Action] OR "Antihypertensive Agents"[Mesh] OR anti hypertensive\*[tiab] OR antihypertensive\*[tiab] OR blood pressure lowering[tiab] OR BP lowering[tiab] OR drug therapy[tiab] OR acetazolamide[tiab] OR amiloride[tiab] OR amlodipine[tiab] OR atenolol[tiab] OR benazepril[tiab] OR bisoprolol[tiab] OR bumetanide[tiab] OR candesartan[tiab] OR captopril[tiab] OR carvedilol[tiab] OR chlorthalidone[tiab] OR clonidine[tiab] OR diltiazem[tiab] OR doxazosin[tiab] OR ethacrynic acid[tiab] OR enalapril[tiab] OR felodipine [tiab] OR fosinopril[tiab] OR furosemide[tiab] OR hydralazine[tiab] OR hydrochlorothiazide[tiab] OR indapamide[tiab] OR irbesartan[tiab] OR lisinopril[tiab] OR losartan[tiab] OR metoprolol[tiab] OR metolazone [tiab] OR minoxidil[tiab] OR moexipril[tiab] OR nadolol[tiab] OR nebivolol[tiab] OR nifedipine[tiab] OR olmesartan[tiab] OR perindopril[tiab] OR pindolol[tiab] OR prazosin[tiab] OR propranolol[tiab] OR quinapril[tiab] OR ramipril[tiab] OR spironolactone[tiab] OR terazosin[tiab] OR torsemide[tiab] OR telmisartan[tiab] OR timolol[tiab] OR trandolapril[tiab] OR triamterene[tiab] OR verapamil[tiab])

AND

("Orthostatic Intolerance"[Mesh:NoExp] OR "Hypotension, Orthostatic"[Mesh] OR "Syncope, Vasovagal"[Mesh] OR orthostatic hypotension[tiab] OR orthostatic intolerance[tiab] OR postural hypotension[tiab] OR standing blood pressure[tiab] OR standing hypotension [tiab] OR syncope[tiab])

AND

("Randomized Controlled Trials as Topic"[Mesh] OR "Randomized Controlled Trial" [Publication Type] OR "Random Allocation"[Mesh] OR "Placebos"[Mesh] OR random\*[tiab] OR placebo[tiab])

366 results May 13, 2022

## Embase (Elsevier, Embase-com)

Advanced Search

Remove mapping options

Source: Embase (1974-)

Restrict to Publication Types: Article, Conference Paper

#1)

'hypertension'/de OR 'borderline hypertension'/de OR 'diabetic hypertension'/de OR 'essential hypertension'/de OR 'orthostatic hypertension'/de OR 'prehypertension'/de OR 'systolic hypertension'/de OR hypertension:ab,ti OR 'high blood pressure':ab,ti OR prehypertension:ab,ti

#2)

'antihypertensive agent'/exp/mj OR 'anti hypertensive\*':ab,ti OR antihypertensive\*:ab,ti OR 'blood pressure lowering':ab,ti OR 'BP lowering':ab,ti OR acetazolamide:ab,ti OR amiloride:ab,ti OR amlodipine:ab,ti OR atenolol:ab,ti OR benazepril:ab,ti OR bisoprolol:ab,ti OR bumetanide:ab,ti OR candesartan:ab,ti OR captopril:ab,ti OR carvedilol:ab,ti OR chlorthalidone:ab,ti OR clonidine:ab,ti OR diltiazem:ab,ti OR doxazosin:ab,ti OR 'ethacrynic acid':ab,ti OR enalapril:ab,ti OR felodipine:ab,ti OR fosinopril:ab,ti OR furosemide:ab,ti OR hydralazine:ab,ti OR hydrochlorothiazide:ab,ti OR indapamide:ab,ti OR irbesartan:ab,ti OR lisinopril:ab,ti OR losartan:ab,ti OR metoprolol:ab,ti OR metolazone:ab,ti OR minoxidil:ab,ti OR moexipril:ab,ti OR nadolol:ab,ti OR nebivolol:ab,ti OR nifedipine:ab,ti OR olmesartan:ab,ti OR perindopril:ab,ti OR pindolol:ab,ti OR prazosin:ab,ti OR propranolol:ab,ti OR quinapril:ab,ti OR ramipril:ab,ti OR spironolactone:ab,ti OR terazosin:ab,ti OR torsemide:ab,ti OR telmisartan:ab,ti OR timolol:ab,ti OR trandolapril:ab,ti OR triamterene:ab,ti OR verapamil:ab,ti

#3)

'orthostatic intolerance'/de OR 'orthostatic hypotension'/de OR 'faintness'/de OR 'orthostatic hypotension':ab,ti OR 'orthostatic intolerance':ab,ti OR 'postural hypotension':ab,ti OR 'standing blood pressure':ab,ti OR 'standing hypotension':ab,ti OR syncope:ab,ti

#4)

'randomized controlled trial'/exp OR 'randomized controlled trial (topic)'/de OR 'randomization'/exp OR 'placebo'/de OR random\*:ab,ti OR placebo:ab,ti

(#1 AND #2 AND #3 AND #4)

746 results May 13, 2022

**Cochrane Central Register of Controlled Trials (Cochrane Library, Wiley)**

Advanced Search

search in title abstract keywords:

hypertension OR "high blood pressure" OR prehypertension

AND

"anti hypertensive" OR "anti hypertensives" OR antihypertensive\* OR "blood pressure lowering" OR "BP lowering" OR acetazolamide OR amiloride OR amlodipine OR atenolol OR benazepril OR bisoprolol OR bumetanide OR candesartan OR captopril OR carvedilol OR chlorthalidone OR clonidine OR diltiazem OR doxazosin OR "ethacrynic acid" OR enalapril OR felodipine OR fosinopril OR furosemide OR hydralazine OR hydrochlorothiazide OR indapamide OR irbesartan OR lisinopril OR losartan OR metoprolol OR metolazone OR minoxidil OR moexipril OR nadolol OR nebivolol OR nifedipine OR olmesartan OR perindopril OR pindolol OR prazosin OR propranolol OR quinapril OR ramipril OR spironolactone OR terazosin OR torsemide OR telmisartan OR timolol OR trandolapril OR triamterene OR verapamil

AND

"orthostatic hypotension" OR "orthostatic intolerance" OR "postural hypotension" OR "standing blood pressure" OR "standing hypotension" OR syncope

475 results May 13, 2022

*Note there were fewer articles identified from Cochrane Central due to a refinement in the search strategy that removed the "AND random\* OR placebo" line.*

## **Summary**

PubMed 366

Embase 746

Cochrane Central 475

1587 references across all databases

52 new unique references retrieved from search May 13, 2022.

7 duplicates identified during import to Covidence: 45 new references for screening at title and abstract level

**eFigure 1.** PRISMA diagram of the updated systematic review

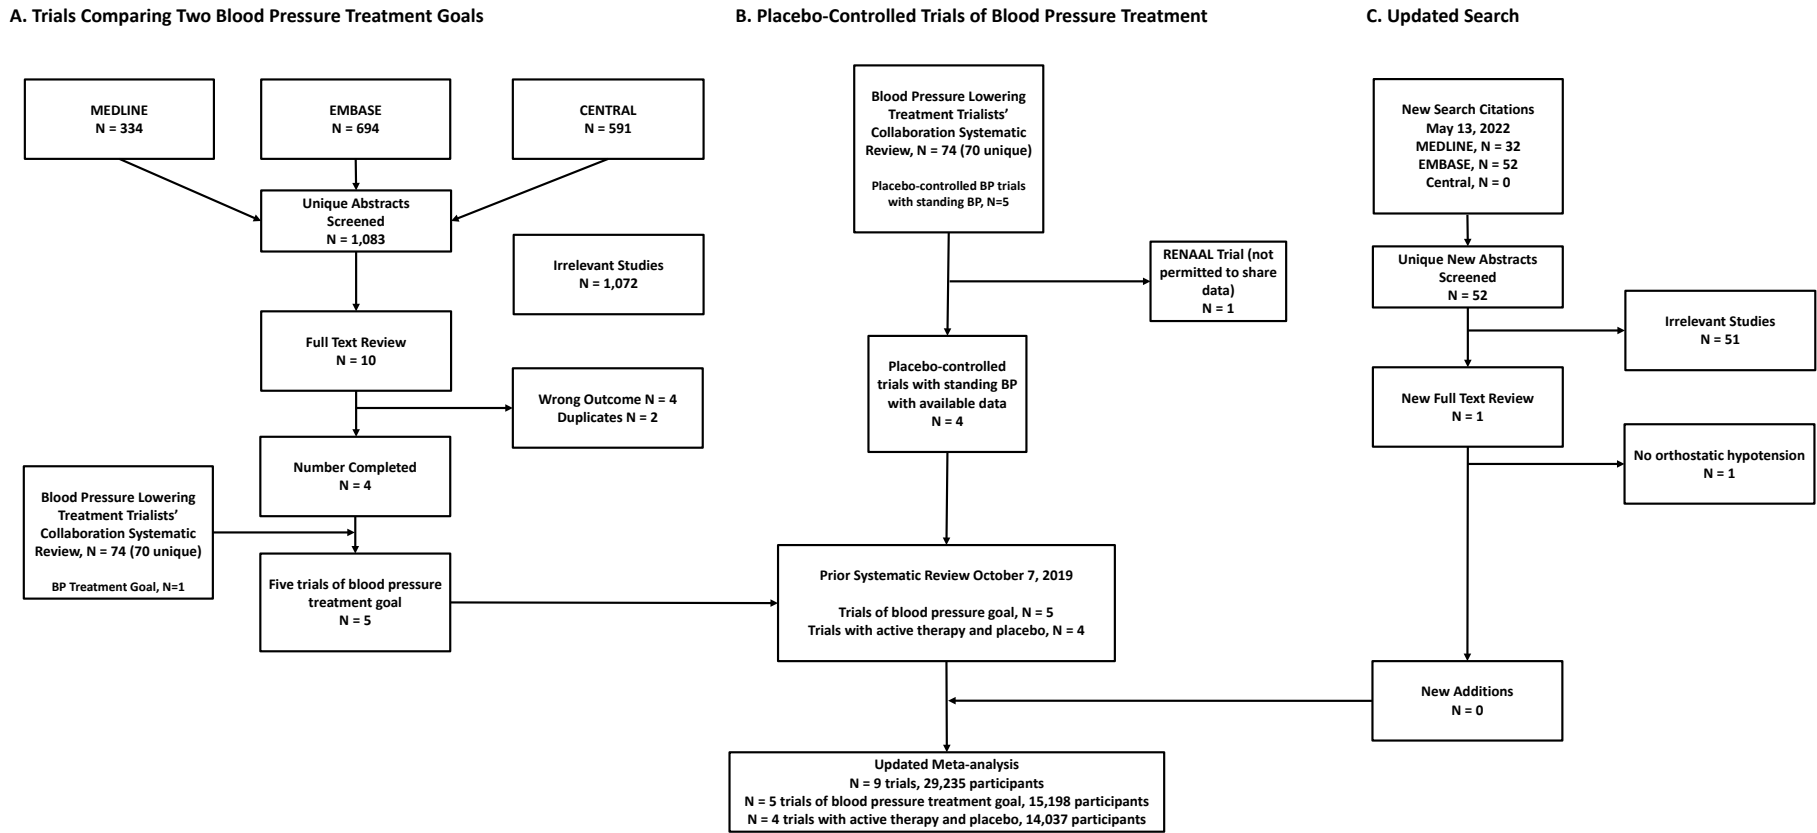



**eFigure 2.** Updated meta-analysis of the effects of hypertension treatment on orthostatic hypotension

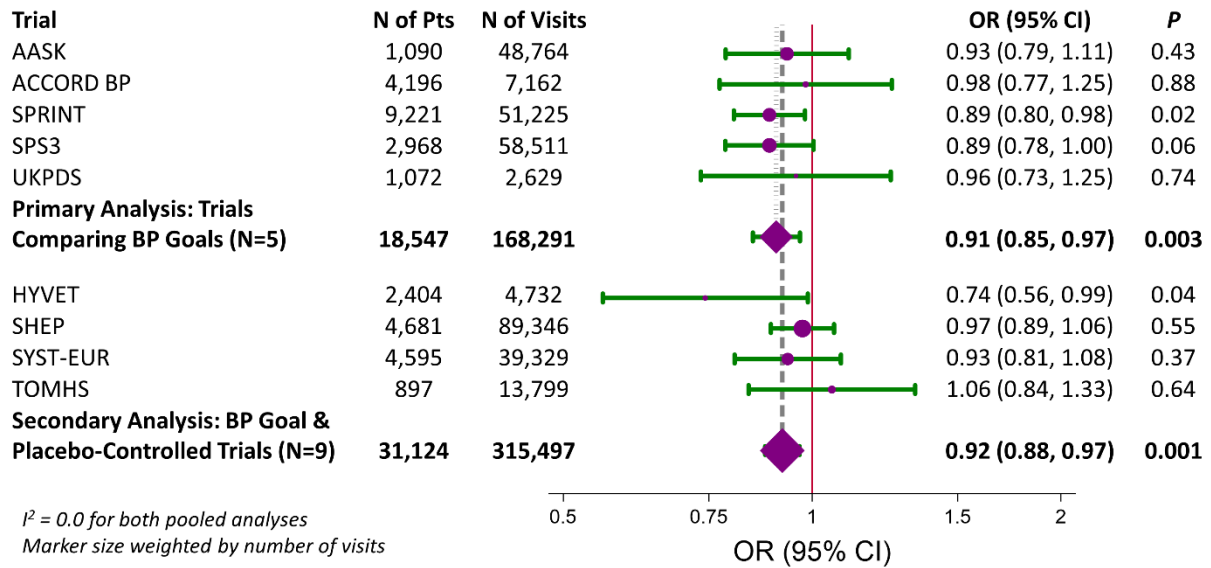

This was updated from the Juraschek et al, *Annals of Internal Medicine* 2020 manuscript. Note that an additional visit file was found for the SPS3 trial, which increased the total number of assessments included in the meta-analysis.

**eFigure 3.** Cumulative incidence of cardiovascular disease or all-cause mortality by treatment assignment and orthostatic hypotension status

Follow-up data across the 9 trials censored at 5-years for **(A)** CVD or all-cause mortality or **(B)** All-cause mortality. The number at risk each year of follow-up is tabulated below each figure. Abbreviations: CVD, cardiovascular disease; Low/Act represents a low blood pressure goal or active treatment assignment; OH represents orthostatic hypotension; Std/Pla represents a standard goal or placebo assignment

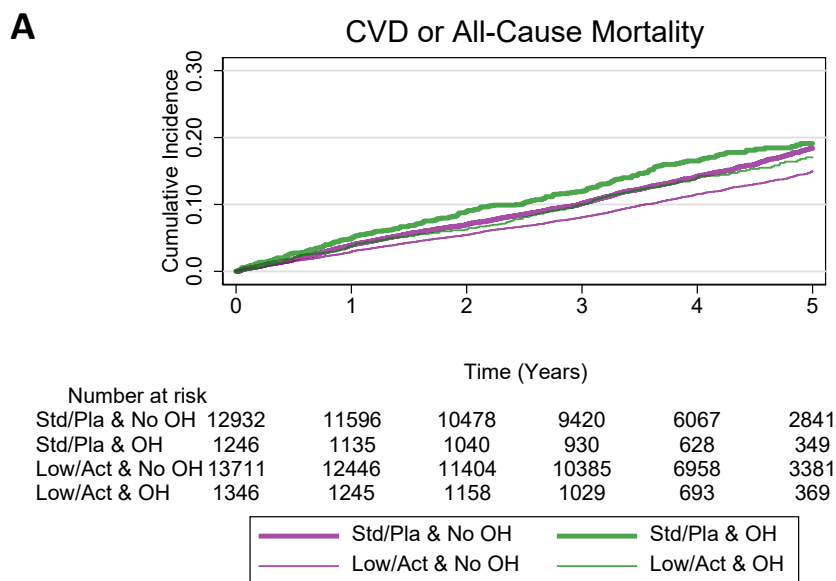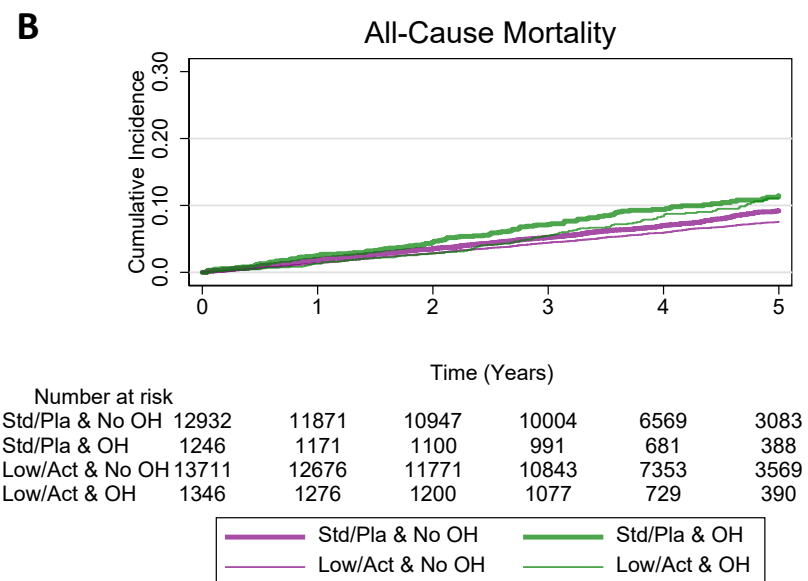

**eFigure 4.** Cumulative incidence of cardiovascular disease or all-cause mortality by treatment assignment and orthostatic hypotension status

Follow-up data across the 9 trials censored at 5-years for **(A)** CVD or all-cause mortality or **(B)** All-cause mortality. The number at risk each year of follow-up is tabulated below each figure. Abbreviations: CVD, cardiovascular disease; HYP represents standing hypotension; Low/Act represents a low blood pressure goal or active treatment assignment; Std/Pla represents a standard goal or placebo assignment

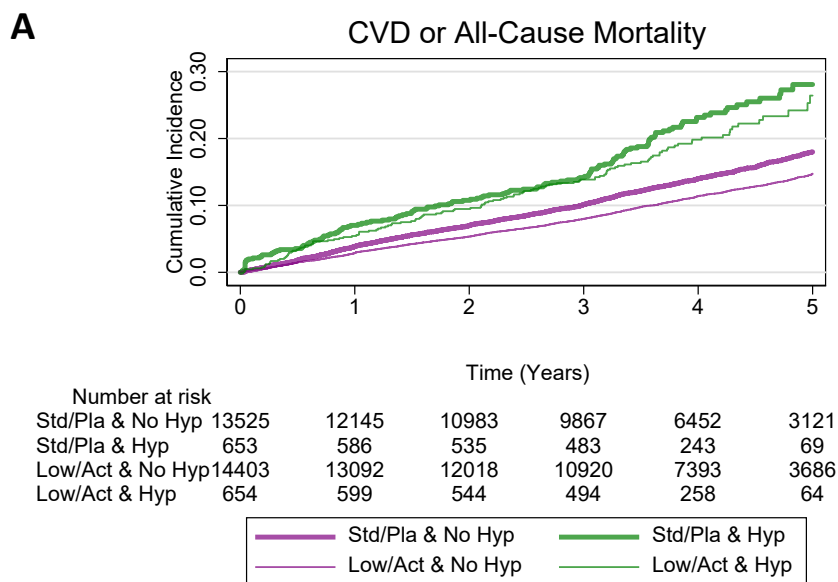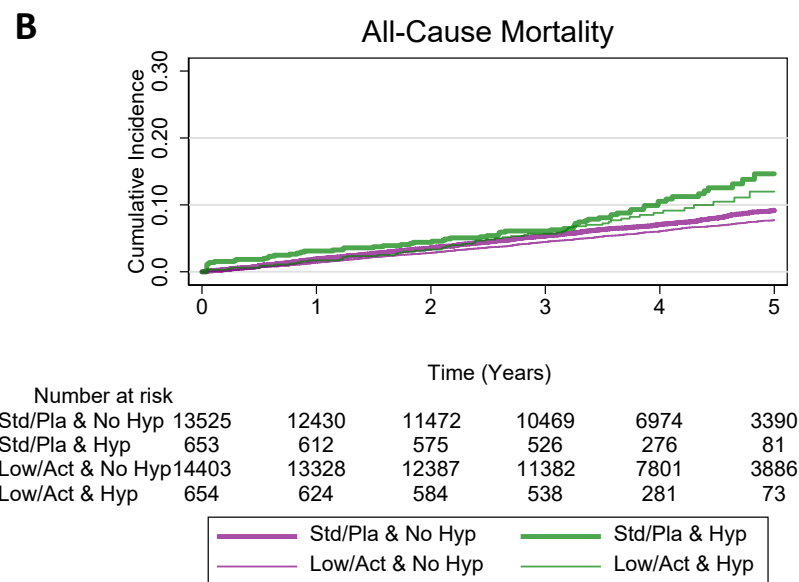

**eFigure 5.** Restricted cubic spline of difference in diastolic blood pressure or standing blood pressure

Adjusted hazard ratios by treatment status for change in diastolic blood pressure (DBP) with (A) cardiovascular disease or death or (B) all-cause mortality as well as for standing systolic blood pressure with (C) cardiovascular disease or death or (D) all-cause mortality, using a restricted cubic spline with 4 knots determined by Harrell’s method. Figures are based on data from all nine trials. Shade represents 95% confidence intervals. Both models were expressed relative to the median value and were truncated at the 2.5<sup>th</sup> and 97.5<sup>th</sup> percentiles. Models were adjusted for age, sex, and study. The hazard ratios are shown on a natural log scale. Included are kernel density plots, representing the distribution of change in DBP or standing DBP by treatment and by outcome status: low goal/active treatment, no outcome (blue, thick), low goal/active treatment outcome (blue, thin), standard goal/placebo, no outcome (red, thick), and standard goal/placebo, outcome (red, thin).

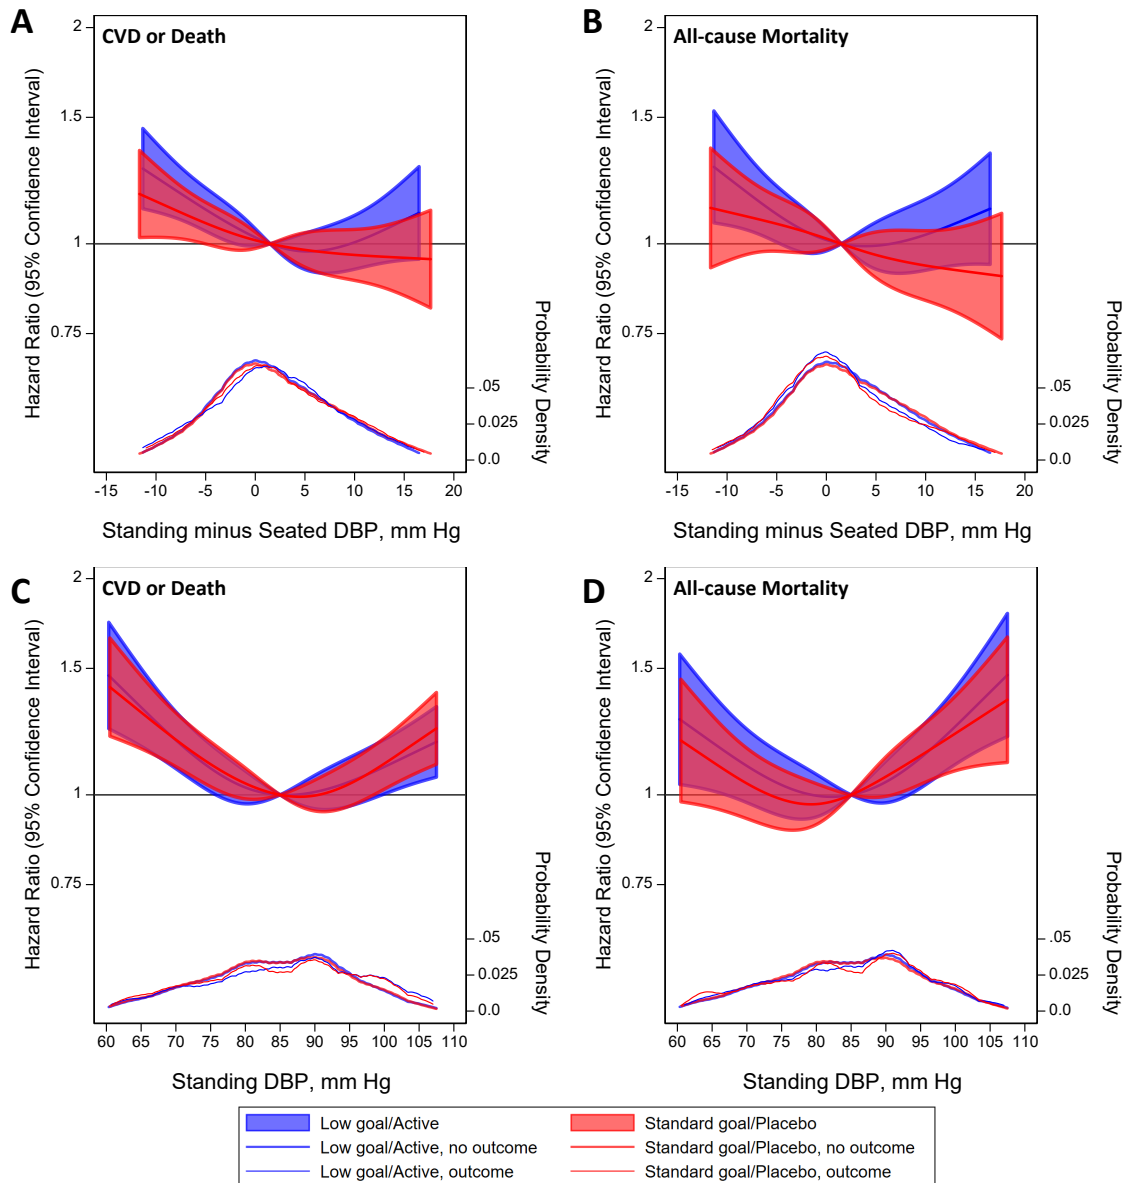

**eFigure 6.** Fully adjusted splines of difference in systolic blood pressure or standing blood pressure

Adjusted hazard ratios by treatment status for change in systolic blood pressure (SBP) with (A) cardiovascular disease or death or (B) all-cause mortality as well as for standing systolic blood pressure with (C) cardiovascular disease or death or (D) all-cause mortality, using a restricted cubic spline with 4 knots determined by Harrell’s method. Figures are based on data from all nine trials. Shade represents 95% confidence intervals. Both models were expressed relative to the median value and were truncated at the 2.5<sup>th</sup> and 97.5<sup>th</sup> percentiles. Models were adjusted for age, sex, study, baseline systolic blood pressure, baseline diastolic blood pressure, body mass index, estimated glomerular filtration rate <60 mL/min per 1.73 m<sup>2</sup> or self-reported kidney disease, and history of diabetes. There were 10,707 participants contributing to all standard goal/placebo curves and 11,227 participants for the difference curves among those assigned low goal/active therapy and 11,228 participants for the standing SBP curves among those assigned log goal/active therapy. The hazard ratios are shown on a natural log scale. Included are kernel density plots, representing the distribution of change in SBP or standing SBP by treatment and by outcome status: low goal/active treatment, no outcome (blue, thick), low goal/active treatment outcome (blue, thin), standard goal/placebo, no outcome (red, thick), and standard goal/placebo, outcome (red, thin).

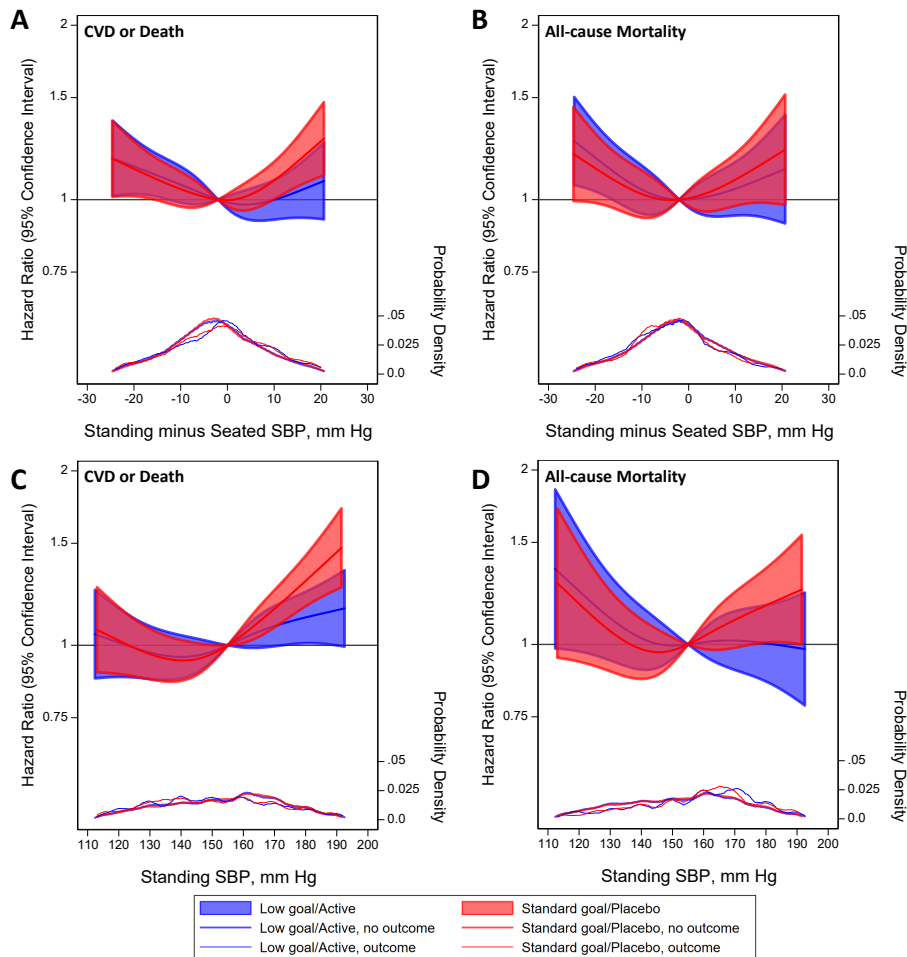

**eFigure 7.** Fully adjusted splines of difference in diastolic blood pressure or standing blood pressure

Adjusted hazard ratios by treatment status for change in diastolic blood pressure (DBP) with (A) cardiovascular disease or death or (B) all-cause mortality as well as for standing systolic blood pressure with (C) cardiovascular disease or death or (D) all-cause mortality, using a restricted cubic spline with 4 knots determined by Harrell's method. Figures are based on data from all nine trials. Shade represents 95% confidence intervals. Both models were expressed relative to the median value and were truncated at the 2.5<sup>th</sup> and 97.5<sup>th</sup> percentiles. Models were adjusted for age, sex, study, baseline systolic blood pressure, baseline diastolic blood pressure, body mass index, estimated glomerular filtration rate <60 mL/min per 1.73 m<sup>2</sup> or self-reported kidney disease, and history of diabetes. There were 10,707 participants contributing to all standard goal/placebo curves and 11,229 participants contributing to all low goal/active therapy curves. The hazard ratios are shown on a natural log scale. Included are kernel density plots, representing the distribution of change in DBP or standing DBP by treatment and by outcome status: low goal/active treatment, no outcome (blue, thick), low goal/active treatment outcome (blue, thin), standard goal/placebo, no outcome (red, thick), and standard goal/placebo, outcome (red, thin).

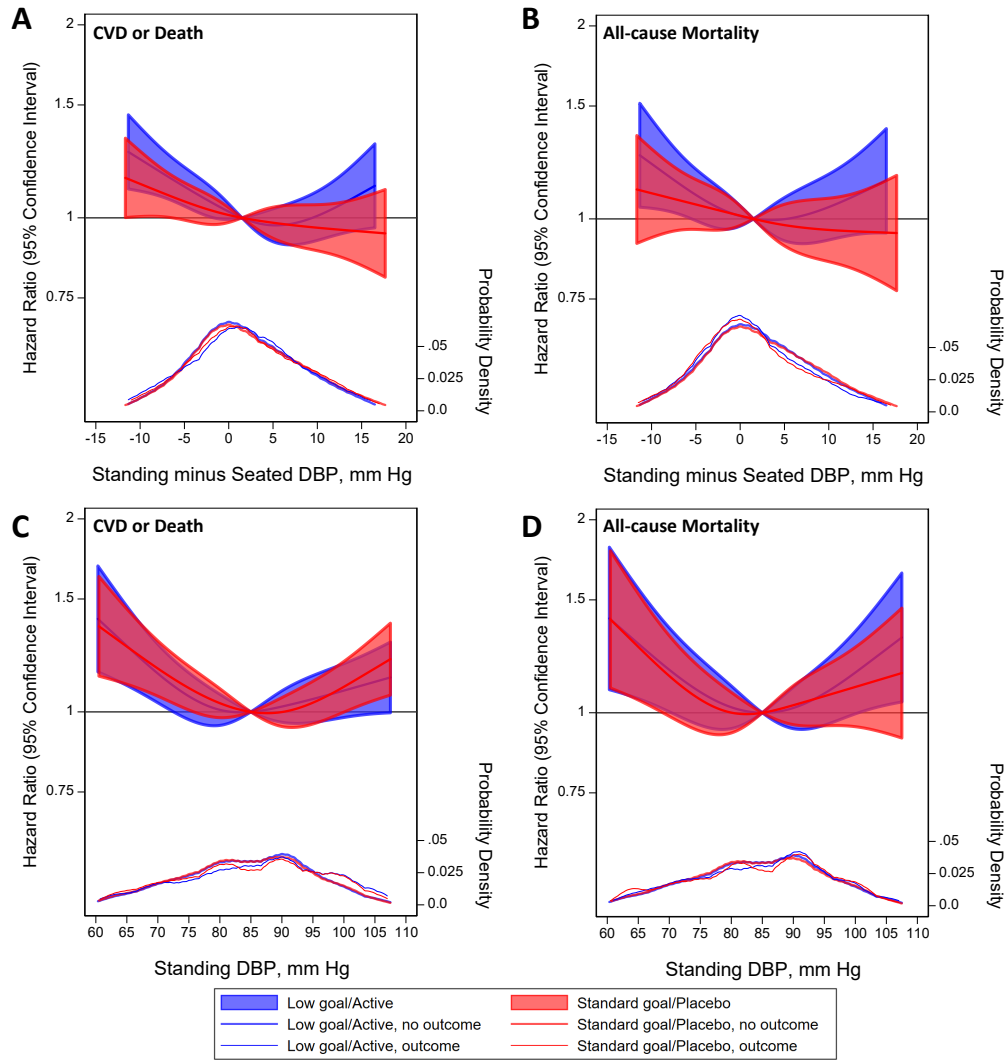

**eFigure 8.** Two-stage meta-analysis, orthostatic hypotension and cardiovascular disease or all-cause mortality

Two-stage meta-analysis examining the associations with cardiovascular disease or all-cause mortality of (A) orthostatic hypotension (OH, yes versus no), (B) a low or active treatment assignment (Low/Act) versus standard or placebo assignment (Std/Pla) among participants without OH, (C) Low/Act versus Std/Pla among participants with OH, and (D) the interaction between OH and treatment assignment. Individual effects were determined based on Cox models adjusted for age and sex. The pooled effect from the 9 trials were weighted with the inverse variance, using a random effects model.

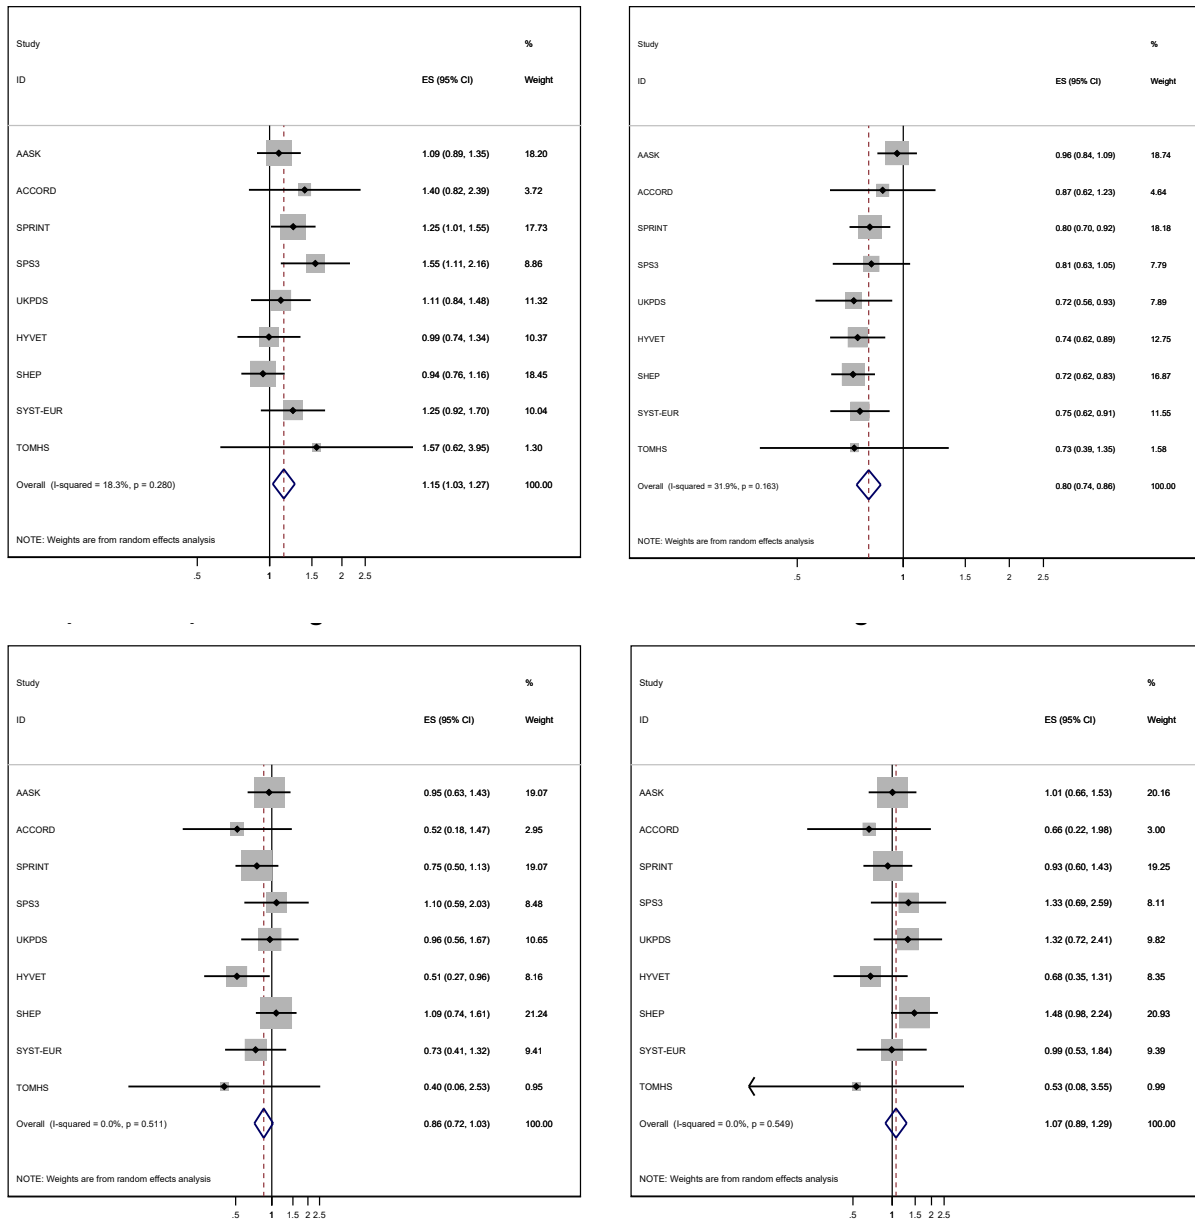



**eFigure 9.** Two-stage meta-analysis, orthostatic hypotension and all-cause mortality

Two-stage meta-analysis examining the associations with all-cause mortality of (A) orthostatic hypotension (OH, yes versus no), (B) a low or active treatment assignment (Low/Act) versus standard or placebo assignment (Std/Pla) among participants without OH, (C) Low/Act versus Std/Pla among participants with OH, and (D) the interaction between OH and treatment assignment. Individual effects were determined based on Cox models adjusted for age and sex. The pooled effect from the 9 trials were weighted with the inverse variance, using a random effects model.

**A. Observational association: OH & Outcome**

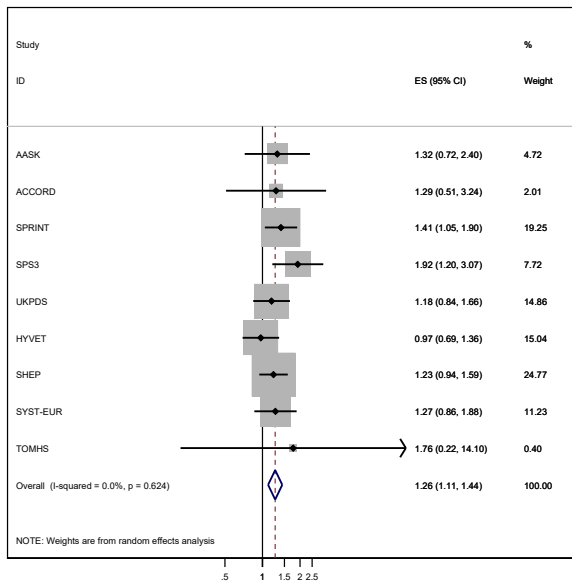

**B. Low/Act vs Std/Pla among those without OH**

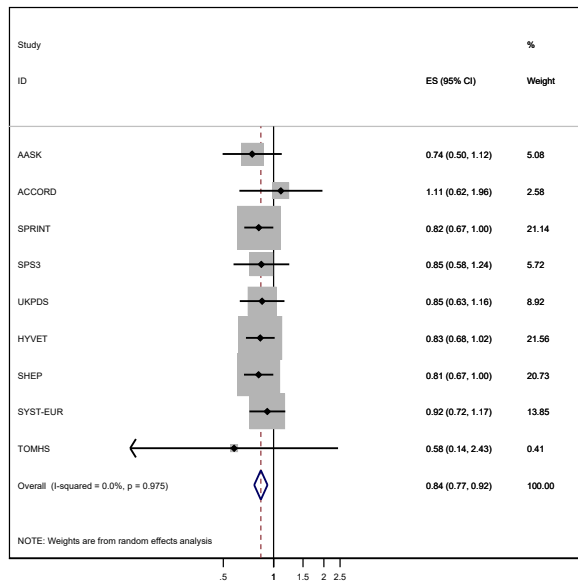

**C. Low/Act vs Std/Pla among those with OH**

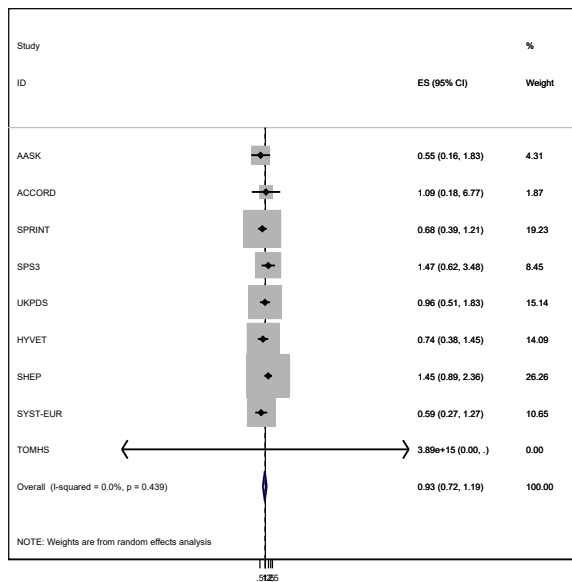

**D. Interaction of Assignment and OH**

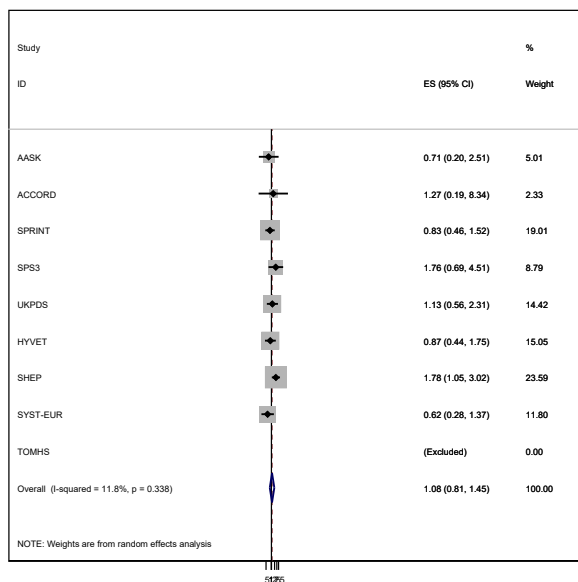

**eFigure 10.** Two-stage meta-analysis, standing hypotension and cardiovascular disease or all-cause mortality

Two-stage meta-analysis examining the associations with cardiovascular disease or all-cause mortality of (A) standing hypotension (HYP, yes versus no), (B) a low or active treatment assignment (Low/Act) versus standard or placebo assignment (Std/Pla) among participants without HYP, (C) Low/Act versus Std/Pla among participants with HYP, and (D) the interaction between HYP and treatment assignment. Individual effects were determined based on Cox models adjusted for age and sex. The pooled effect from the 9 trials were weighted with the inverse variance, using a random effects model.

**A. Observational association: HYP & Outcome**

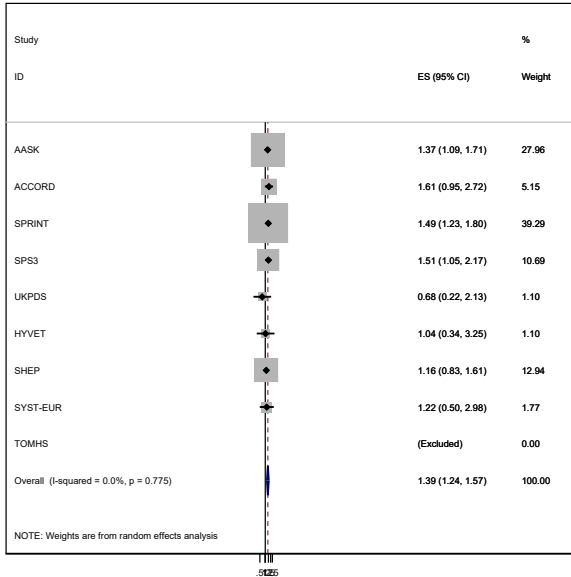

**B. Low/Act vs Std/Pla among those without HYP**

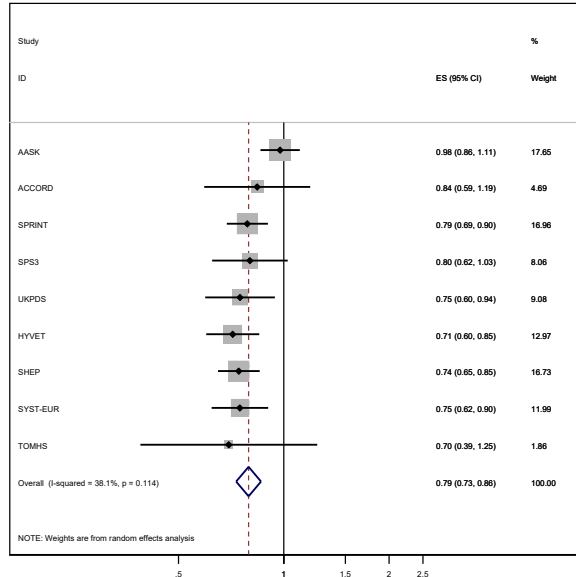

**C. Low/Act vs Std/Pla among those with HYP**

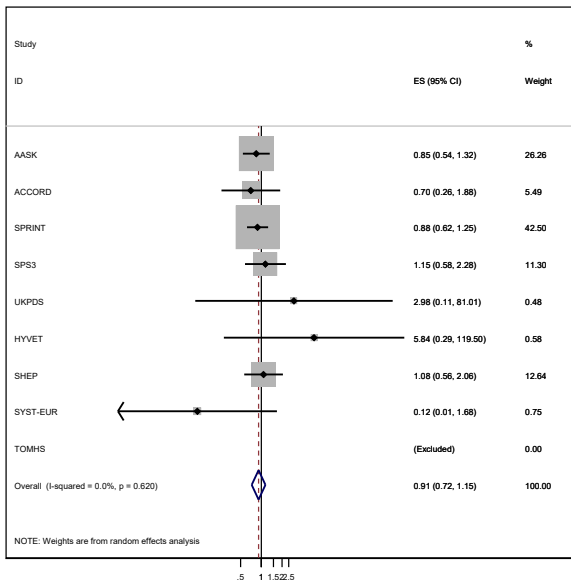

**D. Interaction of Assignment and HYP**

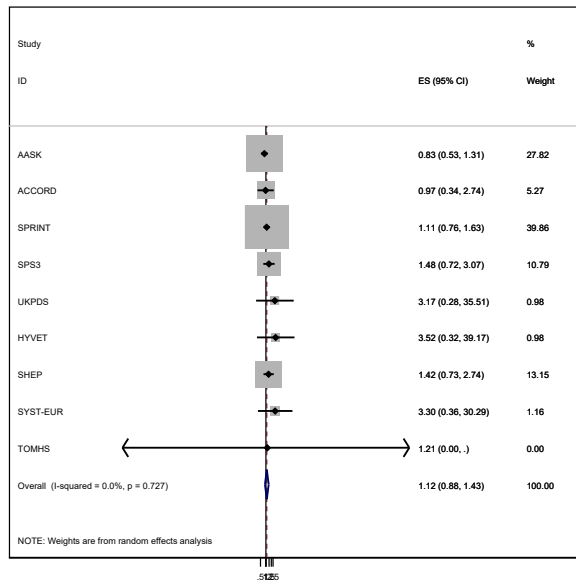

**eFigure 11.** Two-stage meta-analysis, standing hypotension and all-cause mortality

Two-stage meta-analysis examining the associations with all-cause mortality of (A) standing hypotension (HYP, yes versus no), (B) a low or active treatment assignment (Low/Act) versus standard or placebo assignment (Std/Pla) among participants without HYP, (C) Low/Act versus Std/Pla among participants with HYP, and (D) the interaction between HYP and treatment assignment. Individual effects were determined based on Cox models adjusted for age and sex. The pooled effect from the 9 trials were weighted with the inverse variance, using a random effects model.

**A. Observational association: HYP & Outcome**

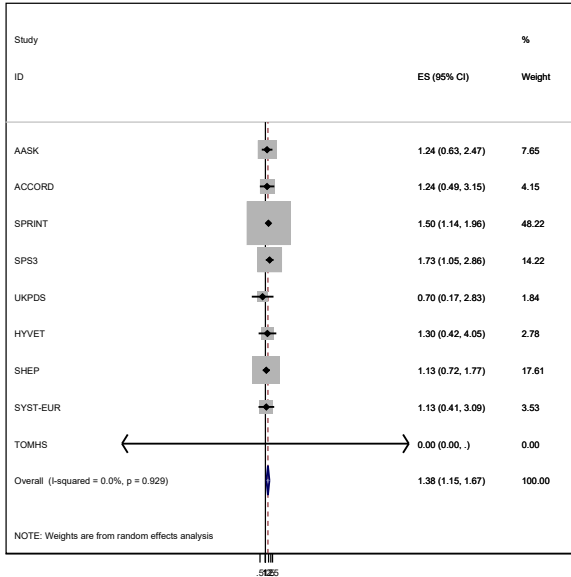

**B. Low/Act vs Std/Pla among those without HYP**

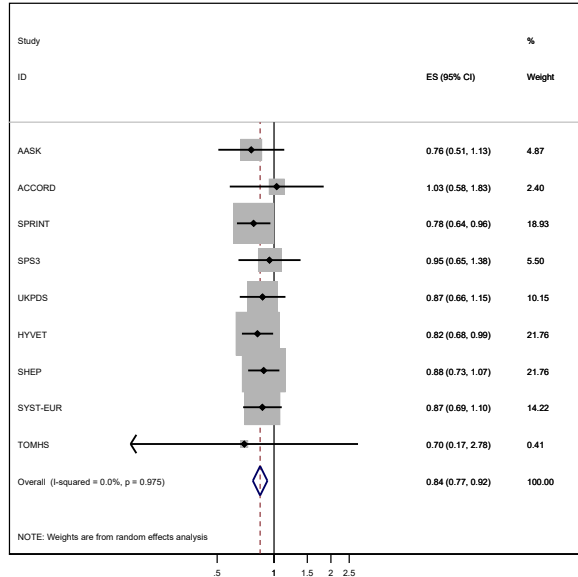

**C. Low/Act vs Std/Pla among those with HYP**

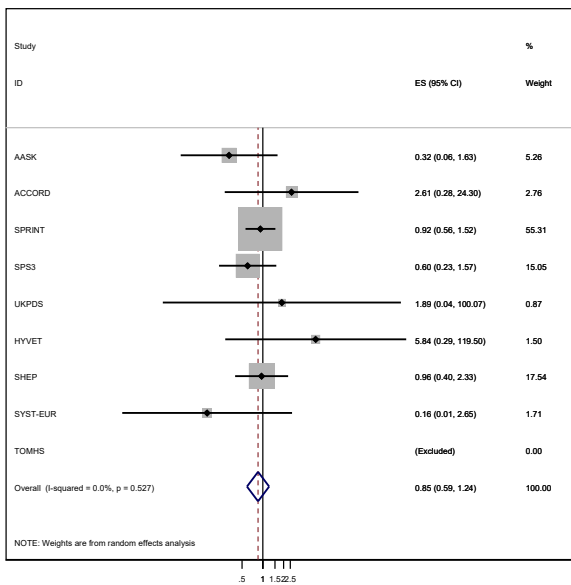

**D. Interaction of Assignment and HYP**

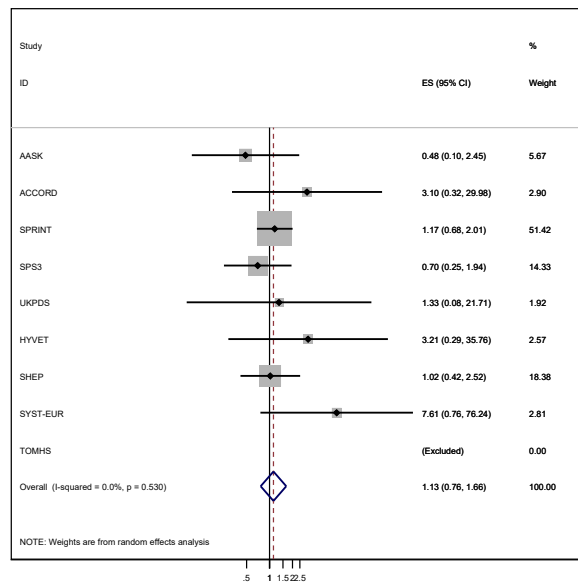

**eTable 1. Comparison of covariate definitions across blood pressure treatment goal trials**

|                 | AASK                                                                                                                       | ACCORD BP                                                                                                                                                                                                                                                                                                                                                                                                                                                                                                                                                  | SPRINT                                                                                                                                                                                                                                                                                                  | SPS3                                                                                                                                                                       | UKPDS                                                                                                                                                                                                        |
|-----------------|----------------------------------------------------------------------------------------------------------------------------|------------------------------------------------------------------------------------------------------------------------------------------------------------------------------------------------------------------------------------------------------------------------------------------------------------------------------------------------------------------------------------------------------------------------------------------------------------------------------------------------------------------------------------------------------------|---------------------------------------------------------------------------------------------------------------------------------------------------------------------------------------------------------------------------------------------------------------------------------------------------------|----------------------------------------------------------------------------------------------------------------------------------------------------------------------------|--------------------------------------------------------------------------------------------------------------------------------------------------------------------------------------------------------------|
| <b>Age</b>      | Reported<br><u>Inclusion:</u> 18-70 years                                                                                  | Reported<br><u>Inclusion:</u> 40-79 years                                                                                                                                                                                                                                                                                                                                                                                                                                                                                                                  | Reported<br><u>Inclusion:</u> ≥50 years                                                                                                                                                                                                                                                                 | Reported<br><u>Inclusion:</u> ≥30 years                                                                                                                                    | Reported<br><u>Inclusion:</u> 25-65 years                                                                                                                                                                    |
| <b>Female</b>   | Reported                                                                                                                   | Reported                                                                                                                                                                                                                                                                                                                                                                                                                                                                                                                                                   | Reported                                                                                                                                                                                                                                                                                                | Reported                                                                                                                                                                   | Reported                                                                                                                                                                                                     |
| <b>Black</b>    | All participants<br>(inclusion criterion)                                                                                  | Reported                                                                                                                                                                                                                                                                                                                                                                                                                                                                                                                                                   | Reported                                                                                                                                                                                                                                                                                                | Reported                                                                                                                                                                   | Afro-Caribbean                                                                                                                                                                                               |
| <b>BMI</b>      | Measured height and weight                                                                                                 | Measured height and weight                                                                                                                                                                                                                                                                                                                                                                                                                                                                                                                                 | Measured height and weight                                                                                                                                                                                                                                                                              | Measured height and weight                                                                                                                                                 | Measured height and weight                                                                                                                                                                                   |
| <b>CKD</b>      | Measured creatinine, CKD EPI equation, <60                                                                                 | Measured creatinine, CKD EPI equation eGFR <60 mL/min per 1.73 m <sup>2</sup>                                                                                                                                                                                                                                                                                                                                                                                                                                                                              | Measured creatinine, CKD EPI equation eGFR <60 mL/min per 1.73 m <sup>2</sup>                                                                                                                                                                                                                           | Measured creatinine, CKD EPI equation eGFR <60 mL/min per 1.73 m <sup>2</sup> ;<br><u>Exclusion:</u> Participants with an estimated GFR <40 mL/min per 1.73 m <sup>2</sup> | Measured creatinine, CKD EPI equation eGFR <60 mL/min per 1.73 m <sup>2</sup> .<br><u>Exclusion:</u> serum creatinine concentration > 175 mmol/l                                                             |
| <b>Diabetes</b> | Baseline fasting glucose ≥ 126 mg/dL . AASK excluded adults with a fasting glucose ≥140 mg/dL or random glucose >200 mg/dL | <u>Inclusion:</u><br>1. Type 2 diabetes mellitus defined according to the 1997 ADA criteria for 3 mo<br>2. An HbA1c level (obtained 3 mo before anticipated date of randomization) of<br>a. 7.5%–11%: (i) If on insulin 1 U/kg and on 0 or 1 oral agent or (ii) If not on insulin, and on 0, 1, or 2 oral agents<br>b. 7.5%–9%: (i) If on insulin 1 U/kg and on 2 oral agents, (ii) If on insulin 1 U/kg and 0 oral agents, or (iii) If not on insulin and on 3 oral agents)<br>Oral agents included: insulin secretagogues, biguanides, insulin enhancers | <u>Exclusion:</u><br>Participants taking medications for diabetes at any time in the last 12 months are excluded.<br>Participants were also excluded if they had a fasting plasma glucose ≥126 mg/dL, A1C ≥6.5%, a 2-hour OGTT (2-h PG) ≥200 mg/dL or a random plasma glucose concentration ≥200 mg/dL. | Chronic elevation of fasting serum glucose, >120 mg/dL or chronic requirement for glucose lowering medications (insulin secretagogues, biguanides, insulin enhancers)      | <u>Inclusion:</u><br>Newly diagnosed diabetes with fasting plasma glucose 6.1-15.0 mmol/l without diabetic symptoms<br><br><u>Exclusion:</u><br>Ketonuria >3 mmol/l<br>Retinopathy requiring laser treatment |

|               |                          |                                                                                                                                                                                         |                                                                                                                                                                                                                                                                                                                                                                                                                                                                                                                                                 |                                                                                                                                                                                                                                                                                                                                                                                                                        |                                                       |
|---------------|--------------------------|-----------------------------------------------------------------------------------------------------------------------------------------------------------------------------------------|-------------------------------------------------------------------------------------------------------------------------------------------------------------------------------------------------------------------------------------------------------------------------------------------------------------------------------------------------------------------------------------------------------------------------------------------------------------------------------------------------------------------------------------------------|------------------------------------------------------------------------------------------------------------------------------------------------------------------------------------------------------------------------------------------------------------------------------------------------------------------------------------------------------------------------------------------------------------------------|-------------------------------------------------------|
| <b>Stroke</b> | Not reported at baseline | Not reported at baseline                                                                                                                                                                | <u>Exclusion:</u> History of stroke                                                                                                                                                                                                                                                                                                                                                                                                                                                                                                             | <u>Inclusion:</u> A recent (within 180 days), symptomatic, MRI-confirmed lacunar stroke (>24 hours), and were without surgically amenable ipsilateral carotid artery stenosis or high-risk cardioembolic sources.<br>Main exclusion criteria included disabling stroke (modified Rankin score of 4 or higher), previous intracranial hemorrhage from non-traumatic causes, retinal stroke, or cortical ischemic stroke | Self-reported                                         |
| <b>CVD</b>    | Not reported at baseline | History of CVD (prior MI, stroke, arterial revascularization, angina with ischemic changes on ECG at rest, changes on a graded exercise test, or positive cardiac imaging test results) | <u>Inclusion:</u> Clinical CVD (other than stroke):<br>a) Previous myocardial infarction, percutaneous coronary intervention, CABG, carotid endarterectomy (CE), carotid stenting<br>b) Peripheral artery disease with revascularization<br>c) Acute coronary syndrome with or without resting ECG change, ECG changes on a graded exercise test, or positive cardiac imaging study<br>d) At least a 50% diameter stenosis of a coronary, carotid, or lower extremity artery<br>e) Abdominal aortic aneurysm $\geq$ 5 cm with or without repair | MI, angina, CHF, or revascularization procedure (e.g. CABG)                                                                                                                                                                                                                                                                                                                                                            | Self-reported history of stroke, MI, or heart failure |

Abbreviations: ADA: American Diabetes Association; BMI: body mass index; CABG: coronary artery bypass graft; CHF: congestive heart failure; CKD: chronic kidney disease; CKD EPI: chronic kidney disease epidemiology collaboration; CVD: cardiovascular disease; ECG: electrocardiogram; eGFR: estimated glomerular filtration rate; ICD: international classification of disease; MRI: magnetic resonance imaging

Note this Table was adapted from Juraschek et al, *Annals of Internal Medicine*, 2020.

**eTable 2. Comparison of covariate definitions across placebo-controlled trials**

|                 | <b>HYVET</b>                                                                                                               | <b>SHEP</b>                                                                                                                                           | <b>SYST-EUR</b>                                                               | <b>TOMHS</b>                                                                  |
|-----------------|----------------------------------------------------------------------------------------------------------------------------|-------------------------------------------------------------------------------------------------------------------------------------------------------|-------------------------------------------------------------------------------|-------------------------------------------------------------------------------|
| <b>Age</b>      | Reported<br><u>Inclusion:</u> ≥80 years                                                                                    | Calculated using difference of birthdate from randomization visit<br><u>Inclusion:</u> ≥60 years                                                      | Reported<br><u>Inclusion:</u> ≥60 years                                       | Reported<br><u>Inclusion:</u> 45-69 years                                     |
| <b>Female</b>   | Reported                                                                                                                   | Reported                                                                                                                                              | Reported                                                                      | Reported                                                                      |
| <b>Black</b>    | Not Reported                                                                                                               | Reported                                                                                                                                              | Not Reported                                                                  | Reported                                                                      |
| <b>BMI</b>      | Measured height and weight                                                                                                 | Measured height and weight                                                                                                                            | Measured height and weight                                                    | Measured height and weight                                                    |
| <b>CKD</b>      | Measured creatinine, CKD EPI equation eGFR <60 mL/min per 1.73 m <sup>2</sup>                                              | Reported history of kidney disease or protein or blood in urine (Note: creatinine only available in a subset of the population and thus was not used) | Measured creatinine, CKD EPI equation eGFR <60 mL/min per 1.73 m <sup>2</sup> | Measured creatinine, CKD EPI equation eGFR <60 mL/min per 1.73 m <sup>2</sup> |
| <b>Diabetes</b> | Self-reported prevalent cases, antidiabetic treatment, or blood sugar >11.1 mmol/l (irrespective of fasting or nonfasting) | Reported history of non-insulin dependent diabetes<br><u>Exclusion:</u> Insulin dependent diabetes                                                    | Investigator reported diabetes or antidiabetic drug intake                    | Fasting glucose ≥ 126 mg/dL                                                   |
| <b>Stroke</b>   | Reported history of stroke                                                                                                 | Reported history of stroke                                                                                                                            | History of stroke (ICD9 4300-4329, 4340-4349, 4360-4369)                      | <u>Exclusion:</u> Reported history of stroke                                  |
| <b>CVD</b>      | Reported history of stroke, myocardial infarction, or heart failure                                                        | Reported history of a heart attack                                                                                                                    | Reported history of stroke, myocardial infarction, or heart failure           | <u>Exclusion:</u> Reported history of cardiovascular disease                  |

Abbreviations: BMI: body mass index; CKD: chronic kidney disease; CKD EPI: chronic kidney disease epidemiology collaboration; CVD: cardiovascular disease; eGFR: estimated glomerular filtration rate; ICD: international classification of disease; MRI: magnetic resonance imaging

Note this Table was adapted from Juraschek et al, *Annals of Internal Medicine*, 2020.

**eTable 3. Participant characteristics for all trials, trials of blood pressure treatment goal, and placebo-controlled trials**

| <b>Characteristic</b>                                               | <b>All Trials,<br/>N=29,235<br/>Mean (SD) or %</b> | <b>Treatment Goal Trials,<br/>N=15,198<br/>Mean (SD) or %</b> | <b>Placebo-Controlled Trials,<br/>N=14,037<br/>Mean (SD) or %</b> |
|---------------------------------------------------------------------|----------------------------------------------------|---------------------------------------------------------------|-------------------------------------------------------------------|
| <b>Demographic Information</b>                                      |                                                    |                                                               |                                                                   |
| Age, years                                                          | 69.0 (10.9) [N=29235]                              | 64.8 (10.4) [N=15198]                                         | 73.5 (9.5) [N=14037]                                              |
| Age >75 years, %                                                    | 9057/29235 (31.0)                                  | 2696/15198 (17.7)                                             | 6361/14037 (45.3)                                                 |
| Women, %                                                            | 14120/29235 (48.3)                                 | 5705/15198 (37.5)                                             | 8415/14037 (59.9)                                                 |
| Men, %                                                              | 15115/29235 (51.7)                                 | 9493/15198 (62.5)                                             | 5622/14037 (40.1)                                                 |
| Black*, %                                                           | 5517/20702 (26.6)                                  | 4705/15198 (31.0)                                             | 812/5504 (14.8)                                                   |
| <b>Past Medical Conditions</b>                                      |                                                    |                                                               |                                                                   |
| Diabetes, %                                                         | 4817/29231 (16.5)                                  | 3457/15196 (22.7)                                             | 1360/14035 (9.7)                                                  |
| Prior stroke, %                                                     | 2812/26818 (10.5)                                  | 2398/12783 (18.8)                                             | 414/14035 (2.9)                                                   |
| History of CVD, %                                                   | 3657/28134 (13.0)                                  | 2550/14109 (18.1)                                             | 1107/14025 (7.9)                                                  |
| <b>Blood Pressure Measures</b>                                      |                                                    |                                                               |                                                                   |
| Pre-randomization seated SBP, mm Hg                                 | 155.1 (21.4) [N=29235]                             | 141.6 (17.9) [N=15198]                                        | 169.8 (13.9) [N=14037]                                            |
| Pre-randomization seated DBP, mm Hg                                 | 81.9 (11.6) [N=29235]                              | 79.8 (12.6) [N=15198]                                         | 84.3 (9.9) [N=14037]                                              |
| Pre-randomization standing SBP, mm Hg                               | 153.0 (21.1) [N=29235]                             | 142.1 (19.7) [N=15198]                                        | 164.9 (15.4) [N=14037]                                            |
| Pre-randomization standing DBP, mm Hg                               | 84.1 (12.0) [N=29235]                              | 83.0 (13.4) [N=15198]                                         | 85.4 (10.1) [N=14037]                                             |
| Pre-randomization postural change in SBP**, mm Hg                   | -2.1 (11.3) [N=29235]                              | 0.5 (12.4) [N=15198]                                          | -5.0 (9.3) [N=14037]                                              |
| Pre-randomization postural change in DBP**, mm Hg                   | 2.2 (7.4) [N=29235]                                | 3.2 (7.8) [N=15198]                                           | 1.1 (6.8) [N=14037]                                               |
| Pre-randomization seated BP $\geq 130/\geq 80$ mm Hg, %             | 26288/29235 (89.9)                                 | 12260/15198 (80.7)                                            | 14028/14037 (99.9)                                                |
| Pre-randomization OH, %                                             | 2592/29235 (8.9)                                   | 1310/15198 (8.6)                                              | 1282/14037 (9.1)                                                  |
| Standing SBP $\leq 110$ or DBP $\leq 60$ mm Hg pre-randomization, % | 1307/29235 (4.5)                                   | 1094/15198 (7.2)                                              | 213/14037 (1.5)                                                   |
| <b>Physical Measures &amp; Laboratory Values</b>                    |                                                    |                                                               |                                                                   |

|                                                                              |                       |                       |                      |
|------------------------------------------------------------------------------|-----------------------|-----------------------|----------------------|
| Body mass index, kg/m <sup>2</sup>                                           | 28.4 (5.5) [N=29054]  | 30.0 (5.8) [N=15112]  | 26.7 (4.5) [N=13942] |
| Obese, %                                                                     | 9285/29054 (32.0)     | 6569/15112 (43.5)     | 2716/13942 (19.5)    |
| eGFR <sup>***</sup> , mL/min per 1.73 m <sup>2</sup>                         | 70.0 (19.6) [N=23134] | 72.7 (21.6) [N=13706] | 66.1 (15.5) [N=9428] |
| Stage III CKD (eGFR < 60 mL/min per 1.73 m <sup>2</sup> ) <sup>***</sup> , % | 8837/28719 (30.8)     | 4185/14811 (28.3)     | 4652/13908 (33.4)    |

For all trials, the N for the following characteristics was: 20,702 for Black race, 26,818 for prior stroke, 28,134 for history of cardiovascular disease, 29,054 for body mass index and obesity, 23,134 for eGFR, and 28,719 for stage 3 CKD.

Among the blood pressure treatment goal trials, the N for the following characteristics was: 15,196 for diabetes, 12,783 for prior stroke, 14,109 for history of cardiovascular disease, 15,112 for body mass index and obesity, 13,706 for eGFR, and 14,811 for stage 3 CKD.

Among the placebo-controlled trials, the N for the following characteristics was: 5,504 for Black race, 14,035 for diabetes, 14,035 for prior stroke, 14,025 for history of cardiovascular disease, 13,942 for body mass index and obesity, 9,428 for eGFR, and 13,908 for stage 3 CKD.

Abbreviations: BP, blood pressure; CKD, chronic kidney disease; CVD, cardiovascular disease; DBP, diastolic blood pressure; eGFR, estimated glomerular filtration rate; SBP, systolic blood pressure

\*Self-reported

\*\*Standing minus seated blood pressure. Note that since orthostatic hypotension is defined based on either systolic or diastolic thresholds, the means for systolic and diastolic blood pressure are less than the orthostatic hypotension threshold of -20 or -10 mm Hg.

\*\*\*Based on the CKD EPI 2021 race-free, creatinine equation. eGFR was not available from UKPDS or SHEP. UKPDS provides stage III CKD categories based on the 2021 CKD-EPI race-free, creatinine equation. For SHEP we relied on a self-reported history of kidney disease.



**eTable 4. Cross-tabulation of orthostatic hypotension and standing hypotension  
N=29,235**

|                                      | No standing hypotension, N=27,928 | Standing hypotension, N=1,307 |
|--------------------------------------|-----------------------------------|-------------------------------|
| No orthostatic hypotension, N=26,643 | 25,763                            | 880                           |
| Orthostatic hypotension, N=2,592     | 2,165                             | 427                           |

**eTable 5. Baseline characteristics of each blood pressure treatment goal trial**

| Characteristic                                    | AASK |                | ACCORD |                | SPRINT |                | SPS3 |                | UKPDS |                |
|---------------------------------------------------|------|----------------|--------|----------------|--------|----------------|------|----------------|-------|----------------|
|                                                   | N    | Mean (SD) or % | N      | Mean (SD) or % | N      | Mean (SD) or % | N    | Mean (SD) or % | N     | Mean (SD) or % |
| <b>Demographic Information</b>                    |      |                |        |                |        |                |      |                |       |                |
| Age, years                                        | 1089 | 54.6 (10.7)    | 1321   | 62.0 (6.5)     | 9326   | 67.9 (9.4)     | 2345 | 62.9 (10.8)    | 1117  | 56.9 (8.1)     |
| Age >75 years, %                                  | 1089 | 0              | 1321   | 4              | 9326   | 25             | 2345 | 14             | 1117  | 0              |
| Women, %                                          | 1089 | 39             | 1321   | 46             | 9326   | 36             | 2345 | 37             | 1117  | 45             |
| Men, %                                            | 1089 | 61             | 1321   | 54             | 9326   | 64             | 2345 | 64             | 1117  | 55             |
| Black*, %                                         | 1089 | 100            | 1321   | 20             | 9326   | 32             | 2345 | 14             | 1117  | 8              |
| <b>Past Medical Conditions</b>                    |      |                |        |                |        |                |      |                |       |                |
| Diabetes, %                                       | 1089 | 7              | 1321   | 100            | 9324   | 2              | 2345 | 34             | 1117  | 100            |
| Prior stroke, %                                   | 1089 | NA             | 1321   | NA             | 9321   | 1              | 2345 | 100            | 1117  | 0              |
| History of CVD, %                                 | 1089 | NA             | 1321   | 35             | 9326   | 20             | 2345 | 9              | 1117  | 1              |
| <b>Blood Pressure Measures</b>                    |      |                |        |                |        |                |      |                |       |                |
| Pre-randomization seated SBP, mm Hg               | 1089 | 143.9 (22.5)   | 1321   | 138.1 (16.3)   | 9326   | 139.7 (15.6)   | 2345 | 142.0 (18.4)   | 1117  | 158.6 (21.9)   |
| Pre-randomization seated DBP, mm Hg               | 1089 | 88.8 (13.5)    | 1321   | 76.2 (10.7)    | 9326   | 78.1 (11.9)    | 2345 | 77.9 (10.5)    | 1117  | 92.8 (11.2)    |
| Pre-randomization standing SBP, mm Hg             | 1089 | 143.2 (23.5)   | 1321   | 139.5 (16.9)   | 9326   | 140.3 (17.9)   | 2345 | 144.1 (22.3)   | 1117  | 155.2 (21.7)   |
| Pre-randomization standing DBP, mm Hg             | 1089 | 91.6 (14.6)    | 1321   | 79.0 (11.2)    | 9326   | 81.8 (12.9)    | 2345 | 81.0 (12.8)    | 1117  | 93.8 (10.9)    |
| Pre-randomization postural change in SBP**, mm Hg | 1089 | -0.6 (10.8)    | 1321   | 1.3 (13.0)     | 9326   | 0.6 (11.8)     | 2345 | 2.1 (14.0)     | 1117  | -3.3 (13.1)    |
| Pre-randomization postural change in DBP**, mm Hg | 1089 | 2.8 (8.2)      | 1321   | 2.9 (7.8)      | 9326   | 3.7 (7.5)      | 2345 | 3.1 (8.6)      | 1117  | 1.0 (7.3)      |
| Pre-randomization seated BP ≥130/≥80 mm Hg, %     | 1089 | 86             | 1321   | 75             | 9326   | 80             | 2345 | 76             | 1117  | 98             |
| Pre-randomization OH, %                           | 1089 | 9              | 1321   | 8              | 9326   | 7              | 2345 | 10             | 1117  | 17             |

Standing SBP≤110 or  
DBP≤60 mm Hg pre-  
randomization, %

|      |   |      |   |      |   |      |   |      |   |
|------|---|------|---|------|---|------|---|------|---|
| 1089 | 8 | 1321 | 7 | 9326 | 8 | 2345 | 8 | 1117 | 1 |
|------|---|------|---|------|---|------|---|------|---|

**Physical Measures &  
Laboratory Values**

|                                                                    |      |             |      |             |      |             |      |             |      |            |
|--------------------------------------------------------------------|------|-------------|------|-------------|------|-------------|------|-------------|------|------------|
| Body mass index, kg/m <sup>2</sup>                                 | 1089 | 30.6 (6.6)  | 1321 | 32.5 (5.5)  | 9267 | 29.9 (5.8)  | 2340 | 28.8 (5.6)  | 1095 | 29.7 (5.5) |
| Obese, %                                                           | 1089 | 47          | 1321 | 64          | 9267 | 43          | 2340 | 34          | 1095 | 40         |
| eGFR***, mL/min per 1.73<br>m <sup>2</sup>                         | 1087 | 42.4 (13.8) | 1317 | 86.5 (16.8) | 9287 | 72.4 (20.0) | 2015 | 81.1 (18.8) | 0    | NA         |
| Stage III CKD (eGFR < 60<br>mL/min per 1.73 m <sup>2</sup> )***, % | 1087 | 90          | 1317 | 8           | 9287 | 27          | 2015 | 15          | 1105 | 26         |

Abbreviations: BP, blood pressure; CKD, chronic kidney disease; CVD, cardiovascular disease; DBP, diastolic blood pressure; eGFR, estimated glomerular filtration rate; SBP, systolic blood pressure

\*Self-reported

\*\*Standing minus seated blood pressure. Note that since orthostatic hypotension is defined based on either systolic or diastolic thresholds, the means for systolic and diastolic blood pressure are less than the orthostatic hypotension threshold of -20 or -10 mm Hg.

\*\*\*Based on the CKD EPI 2021 race-free, creatinine equation. eGFR was not available from UKPDS. UKPDS provided stage III CKD categories based on the 2021 CKD-EPI race-free, creatinine equation.

**eTable 6. Baseline characteristics of each placebo-controlled trial**

| Characteristic                                        | HYVET |                   | SHEP |                   | SYST-EUR |                   | TOMHS |                               |
|-------------------------------------------------------|-------|-------------------|------|-------------------|----------|-------------------|-------|-------------------------------|
|                                                       | N     | Mean (SD)<br>or % | N    | Mean (SD)<br>or % | N        | Mean (SD) or<br>% | N     | Mean (SD)<br>or %             |
| <b>Demographic Information</b>                        |       |                   |      |                   |          |                   |       |                               |
| Age, years                                            | 3845  | 83.5 (3.2)        | 4602 | 72.1 (6.7)        | 4688     | 70.2 (6.7)        | 902   | 54.8 (6.4)                    |
| Age >75 years, %                                      | 3845  | 100               | 4602 | 33                | 4688     | 22                | 902   | 0                             |
| Women, %                                              | 3845  | 61                | 4602 | 57                | 4688     | 67                | 902   | 38                            |
| Men, %                                                | 3845  | 40                | 4602 | 43                | 4688     | 33                | 902   | 62                            |
| Black*, %                                             | 3845  | NA                | 4602 | 14                | 4688     | NA                | 902   | 20                            |
| <b>Past Medical Conditions</b>                        |       |                   |      |                   |          |                   |       |                               |
| Diabetes, %                                           | 3845  | 10                | 4600 | 10                | 4688     | 10                | 902   | 6                             |
| Prior stroke, %                                       | 3845  | 7                 | 4600 | 2                 | 4688     | 1                 | 902   | 0                             |
| History of CVD, %                                     | 3845  | 12                | 4590 | 9                 | 4688     | 6                 | 902   | 0                             |
| <b>Blood Pressure Measures</b>                        |       |                   |      |                   |          |                   |       |                               |
| Pre-randomization seated SBP, mm Hg                   | 3845  | 173.5 (9.4)       | 4602 | 169.7 (11.6)      | 4688     | 172.8 (11.8)      | 902   | 139.2<br>(13.7)               |
| Pre-randomization seated DBP, mm Hg                   | 3845  | 90.8 (9.1)        | 4602 | 77.1 (9.2)        | 4688     | 84.9 (6.9)        | 902   | 89.7 (4.8)<br>137.9<br>(14.8) |
| Pre-randomization standing SBP, mm Hg                 | 3845  | 167.9 (11.0)      | 4602 | 164.4 (14.7)      | 4688     | 168.0 (14.1)      | 902   | 90.1 (6.6)                    |
| Pre-randomization standing DBP, mm Hg                 | 3845  | 88.7 (9.3)        | 4602 | 80.2 (10.6)       | 4688     | 86.9 (8.4)        | 902   | -1.3 (9.6)                    |
| Pre-randomization postural change in SBP**, mm Hg     | 3845  | -5.5 (7.0)        | 4602 | -5.4 (10.9)       | 4688     | -4.8 (9.0)        | 902   | 0.4 (5.5)                     |
| Pre-randomization postural change in DBP**, mm Hg     | 3845  | -2.1 (5.2)        | 4602 | 3.1 (8.1)         | 4688     | 2.0 (5.7)         | 902   | 99                            |
| Pre-randomization seated BP ≥130/≥80 mm Hg, %         | 3845  | 100               | 4602 | 100               | 4688     | 100               | 902   | 7                             |
| Pre-randomization OH, %                               | 3845  | 9                 | 4602 | 12                | 4688     | 7                 | 902   | 2                             |
| Standing SBP≤110 or DBP≤60 mm Hg pre-randomization, % | 3845  | 1                 | 4602 | 4                 | 4688     | 0                 | 902   |                               |
| <b>Physical Measures &amp; Laboratory Values</b>      |       |                   |      |                   |          |                   |       |                               |
| Body mass index, kg/m <sup>2</sup>                    | 3837  | 24.7 (3.6)        | 4549 | 27.6 (5.1)        | 4654     | 27.0 (4.1)        | 902   | 28.9 (3.6)                    |

|                                                                 |      |             |      |    |      |             |     |             |
|-----------------------------------------------------------------|------|-------------|------|----|------|-------------|-----|-------------|
| Obese, %                                                        | 3837 | 8           | 4549 | 26 | 4654 | 20          | 902 | 36          |
| eGFR***, mL/min per 1.73 m <sup>2</sup>                         | 3845 | 64.9 (16.1) | 0    | NA | 4681 | 66.0 (15.1) | 902 | 72.2 (13.6) |
| Stage III CKD (eGFR < 60 mL/min per 1.73 m <sup>2</sup> )***, % | 3845 | 42          | 4480 | 25 | 4681 | 38          | 902 | 19          |

Abbreviations: BP, blood pressure; CKD, chronic kidney disease; CVD, cardiovascular disease; DBP, diastolic blood pressure; eGFR, estimated glomerular filtration rate; SBP, systolic blood pressure

\*Self-reported

\*\*Standing minus seated blood pressure. Note that since orthostatic hypotension is defined based on either systolic or diastolic thresholds, the means for systolic and diastolic blood pressure are less than the orthostatic hypotension threshold of -20 or -10 mm Hg.

\*\*\*Based on the CKD EPI 2021 race-free, creatinine equation. eGFR was not available from SHEP. In SHEP, participants self-reported history of kidney disease.

**eTable 7. Number of participants by distribution**  
**N=29,235**

|                                                      | Low/Active, no outcome | Low/Active, outcome | Standard/placebo, no outcome | Standard/placebo, outcome |
|------------------------------------------------------|------------------------|---------------------|------------------------------|---------------------------|
| <b>Cardiovascular disease or all-cause mortality</b> |                        |                     |                              |                           |
| <b>Change in SBP</b>                                 | <b>N</b>               | <b>N</b>            | <b>N</b>                     | <b>N</b>                  |
| ≤-30                                                 | 134                    | 42                  | 125                          | 38                        |
| >-30 to ≤-20                                         | 613                    | 114                 | 513                          | 128                       |
| >-20 to ≤-10                                         | 2223                   | 366                 | 1946                         | 428                       |
| >-10 to <10                                          | 8210                   | 1326                | 7523                         | 1502                      |
| ≥10 to <20                                           | 1295                   | 240                 | 1243                         | 271                       |
| ≥20 to <30                                           | 324                    | 59                  | 283                          | 88                        |
| ≥30                                                  | 90                     | 21                  | 75                           | 15                        |
| <b>Standing SBP</b>                                  |                        |                     |                              |                           |
| <110                                                 | 217                    | 54                  | 183                          | 70                        |
| 110 to <130                                          | 1665                   | 270                 | 1507                         | 295                       |
| 130 to <150                                          | 3537                   | 554                 | 3148                         | 608                       |
| 150 to <170                                          | 4742                   | 714                 | 4375                         | 888                       |
| ≥170                                                 | 2728                   | 576                 | 2495                         | 609                       |
| <b>Change in DBP</b>                                 |                        |                     |                              |                           |
| ≤-20                                                 | 53                     | 15                  | 41                           | 12                        |
| >-20 to ≤-10                                         | 457                    | 109                 | 429                          | 128                       |
| >-10 to <10                                          | 10585                  | 1697                | 9447                         | 1921                      |
| ≥10 to <20                                           | 1608                   | 303                 | 1617                         | 363                       |
| ≥20                                                  | 186                    | 44                  | 174                          | 46                        |
| <b>Standing DBP</b>                                  |                        |                     |                              |                           |
| <70                                                  | 1333                   | 266                 | 1268                         | 320                       |
| 70 to <80                                            | 2771                   | 428                 | 2634                         | 489                       |
| 80 to <90                                            | 4313                   | 622                 | 3929                         | 737                       |
| 90 to <100                                           | 3462                   | 529                 | 2984                         | 611                       |
| ≥100                                                 | 1010                   | 323                 | 893                          | 313                       |

**All-cause mortality****Change in SBP**

|              |      |     |      |     |
|--------------|------|-----|------|-----|
| ≤-30         | 144  | 32  | 136  | 27  |
| >-30 to ≤-20 | 666  | 61  | 578  | 63  |
| >-20 to ≤-10 | 2401 | 188 | 2171 | 203 |
| >-10 to <10  | 8932 | 604 | 8352 | 673 |
| ≥10 to <20   | 1444 | 91  | 1426 | 88  |
| ≥20 to <30   | 361  | 22  | 337  | 34  |
| ≥30          | 99   | 12  | 83   | 7   |

**Standing SBP**

|             |      |     |      |     |
|-------------|------|-----|------|-----|
| <110        | 258  | 13  | 230  | 23  |
| 110 to <130 | 1856 | 79  | 1715 | 87  |
| 130 to <150 | 3879 | 212 | 3534 | 222 |
| 150 to <170 | 5092 | 364 | 4829 | 434 |
| ≥170        | 2962 | 342 | 2775 | 329 |

**Change in DBP**

|              |       |     |       |     |
|--------------|-------|-----|-------|-----|
| ≤-20         | 59    | 9   | 45    | 8   |
| >-20 to ≤-10 | 519   | 47  | 498   | 59  |
| >-10 to <10  | 11464 | 818 | 10493 | 875 |
| ≥10 to <20   | 1799  | 112 | 1843  | 137 |
| ≥20          | 206   | 24  | 204   | 16  |

**Standing DBP**

|            |      |     |      |     |
|------------|------|-----|------|-----|
| <70        | 1464 | 135 | 1438 | 150 |
| 70 to <80  | 3006 | 193 | 2909 | 214 |
| 80 to <90  | 4653 | 282 | 4340 | 326 |
| 90 to <100 | 3719 | 272 | 3300 | 295 |
| ≥100       | 1205 | 128 | 1096 | 110 |

---

**eTable 8. Association of baseline orthostatic hypotension with cardiovascular disease or all-cause mortality**

| Cardiovascular disease or all-cause mortality | Baseline Orthostatic Hypotension |                                 |                    |        |
|-----------------------------------------------|----------------------------------|---------------------------------|--------------------|--------|
|                                               | Orthostatic hypotension, n/N     | No orthostatic hypotension, n/N | HR (95% CI)        | P      |
| AASK                                          | 96/100                           | 926/989                         | 1.09 (0.89, 1.35)  | 0.41   |
| ACCORD                                        | 15/101                           | 130/1220                        | 1.40 (0.82, 2.39)  | 0.22   |
| SPRINT                                        | 93/683                           | 881/8643                        | 1.26 (1.01, 1.55)  | 0.04   |
| SPS3                                          | 41/239                           | 243/2106                        | 1.55 (1.11, 2.16)  | 0.009  |
| UKPDS                                         | 58/187                           | 253/930                         | 1.11 (0.84, 1.48)  | 0.46   |
| <i>Treatment Goal Trials</i>                  | 303/1310                         | 2433/13888                      | 1.24 (1.10, 1.40)  | <0.001 |
| <br>                                          |                                  |                                 |                    |        |
| HYVET                                         | 46/336                           | 480/3509                        | 0.99 (0.73, 1.35)  | 0.97   |
| SHEP                                          | 102/554                          | 765/4048                        | 0.94 (0.76, 1.15)  | 0.55   |
| SYST-EUR                                      | 45/333                           | 413/4355                        | 1.25 (0.92, 1.70)  | 0.15   |
| TOMHS                                         | 5/59                             | 46/843                          | 1.57 (0.62, 3.95)  | 0.34   |
| <i>Placebo-controlled Trials</i>              | 198/1282                         | 1704/12755                      | 1.00 (0.86, 1.16)  | 0.99   |
| <i>All Trials**</i>                           | 501/2592                         | 4137/26643                      | 1.14 (1.04, 1.26)  | 0.005  |
| <br>                                          |                                  |                                 |                    |        |
| All-Cause Mortality                           | Baseline Orthostatic Hypotension |                                 |                    |        |
|                                               | Orthostatic hypotension, n/N     | No orthostatic hypotension, n/N | HR (95% CI)        | P      |
| AASK                                          | 12/100                           | 94/989                          | 1.32 (0.72, 2.40)  | 0.37   |
| ACCORD                                        | 5/101                            | 47/1220                         | 1.29 (0.51, 3.24)  | 0.59   |
| SPRINT                                        | 49/683                           | 390/8643                        | 1.41 (1.05, 1.90)  | 0.02   |
| SPS3                                          | 21/239                           | 105/2106                        | 1.92 (1.20, 3.07)  | 0.007  |
| UKPDS                                         | 42/187                           | 172/930                         | 1.18 (0.84, 1.66)  | 0.33   |
| <i>Treatment Goal Trials</i>                  | 129/1310                         | 808/13888                       | 1.39 (1.15, 1.68)  | <0.001 |
| <br>                                          |                                  |                                 |                    |        |
| HYVET                                         | 37/336                           | 394/3509                        | 0.97 (0.69, 1.36)  | 0.86   |
| SHEP                                          | 66/554                           | 377/4048                        | 1.23 (0.94, 1.59)  | 0.13   |
| SYST-EUR                                      | 28/333                           | 257/4355                        | 1.27 (0.86, 1.88)  | 0.23   |
| TOMHS                                         | 1/59                             | 8/843                           | 1.76 (0.22, 14.12) | 0.59   |
| <i>Placebo-controlled Trials</i>              | 132/1282                         | 1036/12755                      | 1.11 (0.93, 1.33)  | 0.25   |
| <i>All Trials***</i>                          | 261/2592                         | 1844/26643                      | 1.24 (1.09, 1.41)  | 0.001  |

Abbreviations: CI, confidence interval; HR, hazard ratio; n represents number of events; n/N represents number of events/number of participants at risk

Cox proportional hazards models adjusted for age, sex, and study (as a categorical variable).

There was no evidence for an interaction by treatment arm for individual studies or pooled study groupings with the exception of the SHEP trial for baseline orthostatic hypotension with respect to all-cause mortality ( $P$ -interaction = 0.032).

\*Could not be calculated due to small numbers.

\*\*Egger's test found no statistical evidence of bias ( $P > 0.05$ ).

\*\*\*Egger's test found no statistical evidence of bias ( $P > 0.05$ ).



**eTable 9. Association of baseline standing hypotension with cardiovascular disease or all-cause mortality**

| Cardiovascular disease or all-cause mortality | Baseline Standing Hypotension |                     |                   |         |
|-----------------------------------------------|-------------------------------|---------------------|-------------------|---------|
|                                               | Hypotension, n/N              | No Hypotension, n/N | HR (95% CI)       | P       |
| AASK                                          | 83/84                         | 939/1005            | 1.37 (1.09, 1.72) | 0.006   |
| ACCORD                                        | 16/86                         | 129/1235            | 1.61 (0.95, 2.72) | 0.08    |
| SPRINT                                        | 124/718                       | 850/8608            | 1.49 (1.23, 1.80) | <0.001  |
| SPS3                                          | 33/191                        | 251/2154            | 1.51 (1.05, 2.17) | 0.03    |
| UKPDS                                         | 3/15                          | 308/1102            | 0.68 (0.22, 2.13) | 0.51    |
| <i>Treatment Goal Trials</i>                  | 259/1094                      | 2477/14104          | 1.50 (1.32, 1.71) | <0.001  |
|                                               |                               |                     |                   |         |
| HYVET                                         | 3/22                          | 523/3823            | 1.04 (0.34, 3.25) | 0.94    |
| SHEP                                          | 37/162                        | 830/4440            | 1.16 (0.83, 1.61) | 0.39    |
| SYST-EUR                                      | 5/15                          | 453/4673            | 1.21 (0.50, 2.98) | 0.67    |
| TOMHS                                         | 0/14                          | 51/888              | *                 | *       |
| <i>Placebo-controlled Trials</i>              | 45/213                        | 1857/13824          | 1.11 (0.83, 1.50) | 0.48    |
| <i>All Trials**</i>                           | 304/1307                      | 4334/27928          | 1.39 (1.24, 1.57) | <0.001  |
|                                               |                               |                     |                   |         |
| All-Cause Mortality                           | Baseline Standing Hypotension |                     |                   |         |
|                                               | Hypotension, n/N              | No Hypotension, n/N | HR (95% CI)       | P       |
| AASK                                          | 9/84                          | 97/1005             | 1.24 (0.63, 2.47) | 0.53    |
| ACCORD                                        | 5/86                          | 47/1235             | 1.24 (0.49, 3.15) | 0.64    |
| SPRINT                                        | 62/718                        | 377/8608            | 1.50 (1.14, 1.97) | 0.004   |
| SPS3                                          | 18/191                        | 108/2154            | 1.73 (1.05, 2.86) | 0.03    |
| UKPDS                                         | 2/15                          | 212/1102            | 0.70 (0.17, 2.83) | 0.62    |
| <i>Treatment Goal Trials</i>                  | 96/1094                       | 841/14104           | 1.50 (1.21, 1.85) | <0.001  |
|                                               |                               |                     |                   |         |
| HYVET                                         | 3/22                          | 428/3823            | 1.30 (0.42, 4.06) | 0.65    |
| SHEP                                          | 20/162                        | 423/4440            | 1.13 (0.72, 1.77) | 0.60    |
| SYST-EUR                                      | 4/15                          | 281/4673            | 1.13 (0.41, 3.09) | 0.81    |
| TOMHS                                         | 0/14                          | 9/888               | *                 | *       |
| <i>Placebo-controlled Trials</i>              | 27/213                        | 1141/13824          | 1.17 (0.79, 1.72) | 0.43    |
| <i>All Trials***</i>                          | 123/1307                      | 1982/27928          | 1.38 (1.14, 1.66) | <0.0001 |

Abbreviations: CVD, cardiovascular disease; CI, confidence interval; HR, hazard ratio; n represents number of events; N represents overall number of participants.

Cox proportional hazards models adjusted for age, sex, and study (as a categorical variable).

There was no evidence for an interaction by treatment arm for individual studies or pooled study groupings.

\*Could not be calculated due to small numbers.

\*\*Egger's test found no statistical evidence of bias ( $P > 0.05$ ).

\*\*\*Egger's test found no statistical evidence of bias ( $P > 0.05$ ).

**eTable 10. Association of baseline orthostatic hypotension with cardiovascular disease or all-cause mortality adjusted for additional cardiovascular risk factors**

| Cardiovascular disease or all-cause mortality | Baseline Orthostatic Hypotension |                                 |                    |      |
|-----------------------------------------------|----------------------------------|---------------------------------|--------------------|------|
|                                               | Orthostatic hypotension, n/N     | No orthostatic hypotension, n/N | HR (95% CI)        | P    |
| AASK                                          | 96/100                           | 924/987                         | 1.09 (0.88, 1.34)  | 0.44 |
| ACCORD                                        | 15/101                           | 129/1216                        | 1.29 (0.75, 2.25)  | 0.36 |
| SPRINT                                        | 91/675                           | 874/8553                        | 1.16 (0.93, 1.45)  | 0.18 |
| SPS3                                          | 35/199                           | 227/1811                        | 1.32 (0.92, 1.89)  | 0.14 |
| UKPDS                                         | 54/178                           | 247/905                         | 0.95 (0.70, 1.29)  | 0.72 |
| <i>Treatment Goal Trials</i>                  | 291/1253                         | 2401/13472                      | 1.18 (1.04, 1.33)  | 0.01 |
|                                               |                                  |                                 |                    |      |
| HYVET                                         | 46/336                           | 479/3501                        | 0.99 (0.73, 1.34)  | 0.94 |
| SHEP                                          | 96/533                           | 724/3894                        | 0.92 (0.74, 1.13)  | 0.42 |
| SYST-EUR                                      | 45/331                           | 402/4316                        | 1.20 (0.88, 1.64)  | 0.25 |
| TOMHS                                         | 5/59                             | 46/843                          | 1.45 (0.57, 3.69)  | 0.43 |
| <i>Placebo-controlled Trials</i>              | 192/1259                         | 1651/12554                      | 0.99 (0.85, 1.15)  | 0.88 |
|                                               |                                  |                                 |                    |      |
| <i>All Trials</i>                             | 483/2512                         | 4052/26026                      | 1.11 (1.01, 1.22)  | 0.04 |
|                                               |                                  |                                 |                    |      |
| All-Cause Mortality                           | Baseline Orthostatic Hypotension |                                 |                    |      |
|                                               | Orthostatic hypotension, n/N     | No orthostatic hypotension, n/N | HR (95% CI)        | P    |
| AASK                                          | 12/100                           | 94/987                          | 1.32 (0.72, 2.41)  | 0.37 |
| ACCORD                                        | 5/101                            | 47/1216                         | 1.25 (0.48, 3.23)  | 0.65 |
| SPRINT                                        | 47/675                           | 385/8553                        | 1.23 (0.90, 1.67)  | 0.19 |
| SPS3                                          | 18/199                           | 97/1811                         | 1.60 (0.96, 2.66)  | 0.07 |
| UKPDS                                         | 41/178                           | 168/905                         | 1.06 (0.74, 1.51)  | 0.77 |
| <i>Treatment Goal Trials</i>                  | 123/1253                         | 791/13472                       | 1.25 (1.03, 1.52)  | 0.02 |
|                                               |                                  |                                 |                    |      |
| HYVET                                         | 37/336                           | 393/3501                        | 0.95 (0.68, 1.34)  | 0.77 |
| SHEP                                          | 63/533                           | 353/3894                        | 1.23 (0.94, 1.61)  | 0.14 |
| SYST-EUR                                      | 28/331                           | 248/4316                        | 1.15 (0.77, 1.72)  | 0.49 |
| TOMHS                                         | 1/59                             | 8/843                           | 1.91 (0.23, 15.61) | 0.54 |
| <i>Placebo-controlled Trials</i>              | 129/1259                         | 1002/12554                      | 1.10 (0.91, 1.33)  | 0.31 |
| <i>All Trials</i>                             | 252/2512                         | 1793/26026                      | 1.18 (1.03, 1.35)  | 0.02 |

Abbreviations: CI, confidence interval; HR, hazard ratio; n represents number of events; n/N represents number of events/number of participants at risk

Cox proportional hazards models adjusted for age, sex, seated systolic blood pressure, seated diastolic blood pressure, eGFR<60 mL/min per 1.73 m<sup>2</sup>, body mass index, and diabetes status

Pooled estimates were additionally adjusted for study (as a categorical variable).

There was no evidence for an interaction by treatment arm for individual studies or pooled study groupings.

**eTable 11. Association of baseline standing hypotension with cardiovascular disease or all-cause mortality adjusted for additional cardiovascular risk factors**

| Cardiovascular disease or all-cause mortality | Baseline Standing Hypotension |                     |                   |        |
|-----------------------------------------------|-------------------------------|---------------------|-------------------|--------|
|                                               | Hypotension, n/N              | No Hypotension, n/N | HR (95% CI)       | P      |
| AASK                                          | 83/84                         | 937/1003            | 1.53 (1.20, 1.97) | <0.001 |
| ACCORD                                        | 16/86                         | 128/1231            | 1.67 (0.94, 2.95) | 0.08   |
| SPRINT                                        | 124/713                       | 841/8515            | 1.53 (1.24, 1.89) | <0.001 |
| SPS3                                          | 28/162                        | 234/1848            | 1.53 (1.00, 2.35) | 0.05   |
| UKPDS                                         | 3/15                          | 298/1068            | 1.10 (0.34, 3.51) | 0.88   |
| <i>Treatment Goal Trials</i>                  | 254/1060                      | 2438/13665          | 1.63 (1.41, 1.88) | <0.001 |
| <br>                                          |                               |                     |                   |        |
| HYVET                                         | 3/22                          | 522/3815            | 2.34 (0.72, 7.57) | 0.16   |
| SHEP                                          | 37/160                        | 783/4267            | 1.09 (0.76, 1.56) | 0.64   |
| SYST-EUR                                      | 5/15                          | 442/4632            | 1.14 (0.45, 2.92) | 0.78   |
| TOMHS                                         | 0/14                          | 51/888              | *                 | *      |
| <i>Placebo-controlled Trials</i>              | 45/211                        | 1798/13602          | 1.28 (0.94, 1.76) | 0.12   |
| <i>All Trials</i>                             | 299/1271                      | 4236/27267          | 1.55 (1.36, 1.76) | <0.001 |
| <br>                                          |                               |                     |                   |        |
| All-Cause Mortality                           | Baseline Standing Hypotension |                     |                   |        |
|                                               | Hypotension, n/N              | No Hypotension, n/N | HR (95% CI)       | P      |
| AASK                                          | 9/84                          | 97/1003             | 1.55 (0.72, 3.30) | 0.26   |
| ACCORD                                        | 5/86                          | 47/1231             | 1.02 (0.38, 2.78) | 0.96   |
| SPRINT                                        | 62/713                        | 370/8515            | 1.67 (1.23, 2.26) | 0.001  |
| SPS3                                          | 15/162                        | 100/1848            | 2.27 (1.24, 4.16) | 0.01   |
| UKPDS                                         | 2/15                          | 207/1068            | 1.18 (0.28, 4.90) | 0.82   |
| <i>Treatment Goal Trials</i>                  | 93/1060                       | 821/13665           | 1.71 (1.35, 2.17) | 0.008  |
| <br>                                          |                               |                     |                   |        |
| HYVET                                         | 3/22                          | 427/3815            | 2.83 (0.87, 9.25) | 0.08   |
| SHEP                                          | 20/160                        | 396/4267            | 0.98 (0.60, 1.60) | 0.93   |
| SYST-EUR                                      | 4/15                          | 272/4632            | 1.19 (0.41, 3.46) | 0.75   |

|                                  |          |            |                   |        |
|----------------------------------|----------|------------|-------------------|--------|
| TOMHS                            | 0/14     | 9/888      | *                 | *      |
| <i>Placebo-controlled Trials</i> | 27/211   | 1104/13602 | 1.38 (0.92, 2.08) | 0.12   |
| <i>All Trials</i>                | 120/1271 | 1925/27267 | 1.61 (1.31, 1.98) | <0.001 |

Abbreviations: CVD, cardiovascular disease; CI, confidence interval; HR, hazard ratio; n represents number of events; N represents overall number of participants.

Cox proportional hazards models adjusted for age, sex, seated systolic blood pressure, seated diastolic blood pressure, eGFR<60 mL/min per 1.73 m<sup>2</sup>, body mass index, and diabetes status

Pooled estimates were additionally adjusted for study (as a categorical variable).

There was no evidence for an interaction by treatment arm for individual studies or pooled study groupings.

\*Could not be calculated due to small numbers.

**eTable 12. Association between orthostatic or standing hypotension and outcomes among those assigned a more intensive blood pressure goal or active treatment**

| Cardiovascular disease or all-cause mortality | Baseline Orthostatic Hypotension |                                 |                   |                   | Baseline Standing Hypotension |                     |                   |                   |
|-----------------------------------------------|----------------------------------|---------------------------------|-------------------|-------------------|-------------------------------|---------------------|-------------------|-------------------|
|                                               | Orthostatic hypotension, n/N     | No orthostatic hypotension, n/N | HR (95% CI)       | P                 | Hypotension, n/N              | No Hypotension, n/N | HR (95% CI)       | P                 |
|                                               | AASK                             | 45/47                           | 457/491           | 1.09 (0.80, 1.48) | 0.58                          | 37/38               | 465/500           | 1.23 (0.88, 1.73) |
| ACCORD                                        | 6/56                             | 59/602                          | 1.13 (0.49, 2.63) | 0.77              | 8/49                          | 57/609              | 1.57 (0.74, 3.30) | 0.24              |
| SPRINT                                        | 40/344                           | 396/4319                        | 1.20 (0.87, 1.66) | 0.28              | 59/361                        | 377/4302            | 1.59 (1.20, 2.10) | 0.001             |
| SPS3                                          | 19/114                           | 110/1043                        | 1.81 (1.11, 2.96) | 0.02              | 17/94                         | 112/1063            | 1.86 (1.12, 3.11) | 0.02              |
| UKPDS                                         | 39/126                           | 149/615                         | 1.24 (0.87, 1.76) | 0.24              | 2/7                           | 186/734             | 1.11 (0.28, 4.50) | 0.88              |
| <i>Treatment Goal Trials</i>                  | 149/687                          | 1171/7070                       | 1.24 (1.05, 1.47) | 0.01              | 123/549                       | 1197/7208           | 1.58 (1.31, 1.90) | <0.001            |
| <br>                                          |                                  |                                 |                   |                   |                               |                     |                   |                   |
| HYVET                                         | 14/153                           | 209/1780                        | 0.77 (0.45, 1.32) | 0.33              | 2/10                          | 221/1923            | 1.92 (0.48, 7.74) | 0.36              |
| SHEP                                          | 51/279                           | 333/2029                        | 1.15 (0.86, 1.55) | 0.34              | 18/76                         | 366/2232            | 1.40 (0.87, 2.25) | 0.17              |
| <br>                                          |                                  |                                 |                   |                   |                               |                     | 3.67              |                   |
| SYST-EUR                                      | 21/180                           | 186/2211                        | 1.25 (0.80, 1.96) | 0.33              | 1/7                           | 206/2384            | (0.51, 26.40)     | 0.20              |
| TOMHS                                         | 3/47                             | 31/621                          | 1.31 (0.40, 4.29) | 0.65              | 0/12                          | 34/656              | *                 | *                 |
| <i>Placebo-controlled Trials</i>              | 89/659                           | 759/6641                        | 1.06 (0.85, 1.32) | 0.63              | 21/105                        | 827/7195            | 1.30 (0.84, 2.01) | 0.25              |
| <br>                                          |                                  |                                 |                   |                   |                               |                     |                   |                   |
| <i>All Trials**</i>                           | 238/1346                         | 1930/13711                      | 1.17 (1.02, 1.34) | 0.02              | 144/654                       | 2024/14403          | 1.49 (1.25, 1.77) | <0.001            |
| <br>                                          |                                  |                                 |                   |                   |                               |                     |                   |                   |
| All-Cause Mortality                           | Baseline Orthostatic Hypotension |                                 |                   |                   | Baseline Standing Hypotension |                     |                   |                   |
|                                               | Orthostatic hypotension, n/N     | No orthostatic hypotension, n/N | HR (95% CI)       | P                 | Hypotension, n/N              | No Hypotension, n/N | HR (95% CI)       | P                 |
|                                               | AASK                             | 4/47                            | 41/491            | 1.06 (0.38, 2.96) | 0.92                          | 2/38                | 43/500            | 0.71 (0.17, 2.93) |
| ACCORD                                        | 3/56                             | 24/602                          | 1.30 (0.38, 4.38) | 0.68              | 4/49                          | 23/609              | 1.67 (0.57, 4.94) | 0.35              |
| SPRINT                                        | 20/344                           | 175/4319                        | 1.26 (0.79, 2.01) | 0.33              | 30/361                        | 165/4302            | 1.63 (1.10, 2.42) | 0.02              |
| SPS3                                          | 11/114                           | 49/1043                         | 2.55 (1.32, 4.92) | 0.005             | 7/94                          | 53/1063             | 1.43 (0.65, 3.14) | 0.38              |
| UKPDS                                         | 28/126                           | 106/615                         | 1.24 (0.82, 1.88) | 0.32              | 1/7                           | 133/734             | 0.80 (0.11, 5.74) | 0.82              |

|                                  |          |           |                      |       |        |           |                      |       |
|----------------------------------|----------|-----------|----------------------|-------|--------|-----------|----------------------|-------|
| <i>Treatment Goal Trials</i>     | 66/687   | 395/7070  | 1.38 (1.06, 1.80)    | 0.02  | 44/549 | 417/7208  | 1.54 (1.12, 2.12)    | 0.008 |
| HYVET                            | 14/153   | 182/1780  | 0.89 (0.52, 1.53)    | 0.67  | 2/10   | 194/1923  | 2.24 (0.56, 9.05)    | 0.26  |
| SHEP                             | 37/279   | 173/2029  | 1.62 (1.14, 2.32)    | 0.008 | 9/76   | 201/2232  | 1.15 (0.59, 2.24)    | 0.69  |
| SYST-EUR                         | 11/180   | 126/2211  | 0.98 (0.53, 1.82)    | 0.95  | 1/7    | 136/2384  | 8.91<br>(1.22,65.16) | 0.03  |
| TOMHS                            | 1/47     | 5/621     | 2.73<br>(0.32,23.36) | 0.36  | 0/12   | 6/656     | *                    | *     |
| <i>Placebo-controlled Trials</i> | 63/659   | 486/6641  | 1.20 (0.92, 1.56)    | 0.17  | 12/105 | 537/7195  | 1.25 (0.70, 2.23)    | 0.45  |
| <i>All Trials***</i>             | 129/1346 | 881/13711 | 1.29 (1.07, 1.55)    | 0.008 | 56/654 | 954/14403 | 1.41 (1.07, 1.87)    | 0.01  |

Abbreviations: CI, confidence interval; HR, hazard ratio; n represents number of events; N represents overall number of participant at risk.

Cox proportional hazards models adjusted for age, sex, and study.

Pooled estimates were additionally adjusted for study (as a categorical variable).

\*Could not be calculated due to small numbers.

**eTable 13. Association between orthostatic or standing hypotension and outcomes among those assigned a standard blood pressure goal or placebo**

**Cardiovascular disease  
or all-cause mortality**

|                                  | Baseline Orthostatic Hypotension |                                 |                    |      | Baseline Standing Hypotension |                     |                   |        |
|----------------------------------|----------------------------------|---------------------------------|--------------------|------|-------------------------------|---------------------|-------------------|--------|
|                                  | Orthostatic hypotension, n/N     | No orthostatic hypotension, n/N | HR (95% CI)        | P    | Hypotension, n/N              | No Hypotension, n/N | HR (95% CI)       | P      |
| AASK                             | 51/53                            | 469/498                         | 1.10 (0.82, 1.47)  | 0.53 | 46/46                         | 474/505             | 1.50 (1.11, 2.03) | 0.009  |
| ACCORD                           | 9/45                             | 71/618                          | 1.69 (0.84, 3.39)  | 0.14 | 8/37                          | 72/626              | 1.72 (0.82, 3.61) | 0.15   |
| SPRINT                           | 53/339                           | 485/4324                        | 1.31 (0.98, 1.74)  | 0.07 | 65/357                        | 473/4306            | 1.41 (1.09, 1.84) | 0.01   |
| SPS3                             | 22/125                           | 133/1063                        | 1.37 (0.87, 2.15)  | 0.17 | 16/97                         | 139/1091            | 1.26 (0.75, 2.12) | 0.39   |
| UKPDS                            | 19/61                            | 104/315                         | 0.95 (0.58, 1.55)  | 0.82 | 1/8                           | 122/368             | 0.35 (0.05, 2.54) | 0.30   |
| <i>Treatment Goal Trials</i>     | 154/623                          | 1262/6818                       | 1.25 (1.05, 1.48)  | 0.01 | 136/545                       | 1280/6896           | 1.43 (1.20, 1.71) | <0.001 |
| <br>                             |                                  |                                 |                    |      |                               |                     |                   |        |
| HYVET                            | 32/183                           | 271/1729                        | 1.12 (0.78, 1.62)  | 0.54 | 1/12                          | 302/1900            | 0.53 (0.07, 3.78) | 0.53   |
| SHEP                             | 51/275                           | 432/2019                        | 0.78 (0.58, 1.04)  | 0.09 | 19/86                         | 464/2208            | 0.98 (0.62, 1.56) | 0.94   |
| SYST-EUR                         | 24/153                           | 227/2144                        | 1.27 (0.83, 1.93)  | 0.27 | 4/8                           | 247/2289            | 1.15 (0.41, 3.18) | 0.79   |
| TOMHS                            | 2/12                             | 15/222                          | 2.70 (0.60, 12.13) | 0.20 | 0/2                           | 17/232              | *                 | *      |
| <i>Placebo-controlled Trials</i> | 109/623                          | 945/6114                        | 0.95 (0.78, 1.16)  | 0.62 | 24/108                        | 1030/6629           | 0.98 (0.65, 1.48) | 0.93   |
| <br>                             |                                  |                                 |                    |      |                               |                     |                   |        |
| <i>All Trials**</i>              | 263/1246                         | 2207/12932                      | 1.12 (0.98, 1.27)  | 0.09 | 160/653                       | 2310/13525          | 1.31 (1.11, 1.54) | 0.001  |

**All-Cause Mortality**

|                              | Baseline Orthostatic Hypotension |                                 |                   |      | Baseline Standing Hypotension |                     |                   |      |
|------------------------------|----------------------------------|---------------------------------|-------------------|------|-------------------------------|---------------------|-------------------|------|
|                              | Orthostatic hypotension, n/N     | No orthostatic hypotension, n/N | HR (95% CI)       | P    | Hypotension, n/N              | No Hypotension, n/N | HR (95% CI)       | P    |
| AASK                         | 8/53                             | 53/498                          | 1.48 (0.70, 3.11) | 0.30 | 7/46                          | 54/505              | 1.52 (0.69, 3.35) | 0.30 |
| ACCORD                       | 2/45                             | 23/618                          | 1.04 (0.24, 4.41) | 0.96 | 1/37                          | 24/626              | 0.53 (0.07, 3.98) | 0.54 |
| SPRINT                       | 29/339                           | 215/4324                        | 1.54 (1.04, 2.27) | 0.03 | 32/357                        | 212/4306            | 1.39 (0.96, 2.03) | 0.08 |
| SPS3                         | 10/125                           | 56/1063                         | 1.51 (0.77, 2.96) | 0.23 | 11/97                         | 55/1091             | 1.99 (1.03, 3.81) | 0.04 |
| UKPDS                        | 14/61                            | 66/315                          | 1.09 (0.61, 1.96) | 0.76 | 1/8                           | 79/368              | 0.60 (0.08, 4.30) | 0.61 |
| <i>Treatment Goal Trials</i> | 63/623                           | 413/6818                        | 1.40 (1.07, 1.83) | 0.01 | 52/545                        | 424/6896            | 1.45 (1.08, 1.94) | 0.01 |
| <br>                         |                                  |                                 |                   |      |                               |                     |                   |      |
| HYVET                        | 23/183                           | 212/1729                        | 1.01 (0.66, 1.56) | 0.96 | 1/12                          | 234/1900            | 0.69 (0.10, 4.90) | 0.71 |

|                                  |          |           |                   |      |        |            |                   |      |
|----------------------------------|----------|-----------|-------------------|------|--------|------------|-------------------|------|
| SHEP                             | 29/275   | 204/2019  | 0.91 (0.62, 1.35) | 0.64 | 11/86  | 222/2208   | 1.12 (0.61, 2.06) | 0.71 |
| SYST-EUR                         | 17/153   | 131/2144  | 1.57 (0.94, 2.60) | 0.08 | 3/8    | 145/2289   | 1.05 (0.32, 3.43) | 0.93 |
| TOMHS                            | 0/12     | 3/222     | *                 | *    | 0/2    | 3/232      | *                 | *    |
| <i>Placebo-controlled Trials</i> | 69/623   | 550/6114  | 1.04 (0.81, 1.33) | 0.78 | 15/108 | 604/6629   | 1.12 (0.66, 1.87) | 0.68 |
| <i>All Trials***</i>             | 132/1246 | 963/12932 | 1.19 (0.99, 1.43) | 0.06 | 67/653 | 1028/13525 | 1.34 (1.04, 1.72) | 0.02 |

Abbreviations: CI, confidence interval; HR, hazard ratio; n represents number of events; N represents overall number of participants at risk.

Cox proportional hazards models adjusted for age, sex, and study.

Pooled estimates were additionally adjusted for study (as a categorical variable).

\*Could not be calculated due to small numbers.



**eTable 14. Treatment effects on cardiovascular disease or all-cause mortality by baseline orthostatic hypotension, unadjusted**

| <b>Orthostatic Hypotension</b>                       |                                |                      |                    |                                   |                      |                    |                    |
|------------------------------------------------------|--------------------------------|----------------------|--------------------|-----------------------------------|----------------------|--------------------|--------------------|
| <b>Cardiovascular Disease or All-cause Mortality</b> |                                |                      |                    |                                   |                      |                    |                    |
|                                                      | <b>Orthostatic Hypotension</b> |                      |                    | <b>No Orthostatic Hypotension</b> |                      |                    | <b>P-</b>          |
|                                                      | <b>n/N (Low/Act)</b>           | <b>n/N (Std/Pla)</b> | <b>HR (95% CI)</b> | <b>n/N (Low/Act)</b>              | <b>n/N (Std/Pla)</b> | <b>HR (95% CI)</b> | <b>interaction</b> |
| <b>AASK</b>                                          | 45/47                          | 51/53                | 0.95 (0.63, 1.43)  | 457/491                           | 469/498              | 0.96 (0.84, 1.09)  | 0.97               |
| <b>ACCORD</b>                                        | 6/56                           | 9/45                 | 0.48 (0.17, 1.35)  | 59/602                            | 71/618               | 0.86 (0.61, 1.21)  | 0.31               |
| <b>SPRINT</b>                                        | 40/344                         | 53/339               | 0.74 (0.49, 1.11)  | 396/4319                          | 485/4324             | 0.81 (0.71, 0.92)  | 0.68               |
| <b>SPS3</b>                                          | 19/114                         | 22/125               | 1.08 (0.58, 1.99)  | 110/1043                          | 133/1063             | 0.81 (0.63, 1.04)  | 0.41               |
| <b>UKPDS</b>                                         | 39/126                         | 19/61                | 0.96 (0.55, 1.65)  | 149/615                           | 104/315              | 0.71 (0.55, 0.92)  | 0.35               |
| <b>Treatment Goal Trials</b>                         | 149/687                        | 154/623              | 0.77 (0.62, 0.97)  | 1171/7070                         | 1262/6818            | 0.80 (0.74, 0.87)  | 0.55               |
| <b>HYVET</b>                                         | 14/153                         | 32/183               | 0.50 (0.27, 0.93)  | 209/1780                          | 271/1729             | 0.75 (0.62, 0.89)  | 0.22               |
| <b>SHEP</b>                                          | 51/279                         | 51/275               | 1.06 (0.72, 1.57)  | 333/2029                          | 432/2019             | 0.73 (0.64, 0.85)  | 0.11               |
| <b>SYST-EUR</b>                                      | 21/180                         | 24/153               | 0.75 (0.42, 1.36)  | 186/2211                          | 227/2144             | 0.77 (0.64, 0.94)  | 0.94               |
| <b>TOMHS</b>                                         | 3/47                           | 2/12                 | 0.35 (0.06, 2.10)  | 31/621                            | 15/222               | 0.73 (0.39, 1.35)  | 0.42               |
| <b>Placebo-Controlled Trials</b>                     | 89/659                         | 109/623              | 0.78 (0.59, 1.03)  | 759/6641                          | 945/6114             | 0.71 (0.65, 0.78)  | 0.59               |
| <b>All Trials</b>                                    | 238/1346                       | 263/1246             | 0.80 (0.67, 0.95)  | 1930/13711                        | 2207/12932           | 0.78 (0.73, 0.83)  | 0.87               |
| <b>All-cause Mortality</b>                           |                                |                      |                    |                                   |                      |                    |                    |
|                                                      | <b>Orthostatic Hypotension</b> |                      |                    | <b>No Orthostatic Hypotension</b> |                      |                    | <b>P-</b>          |
|                                                      | <b>n/N (Low/Act)</b>           | <b>n/N (Std/Pla)</b> | <b>HR (95% CI)</b> | <b>n/N (Low/Act)</b>              | <b>n/N (Std/Pla)</b> | <b>HR (95% CI)</b> | <b>interaction</b> |
| <b>AASK</b>                                          | 4/47                           | 8/53                 | 0.52 (0.16, 1.74)  | 41/491                            | 53/498               | 0.75 (0.50, 1.13)  | 0.59               |
| <b>ACCORD</b>                                        | 3/56                           | 2/45                 | 1.22 (0.20, 7.34)  | 24/602                            | 23/618               | 1.09 (0.61, 1.93)  | 0.94               |
| <b>SPRINT</b>                                        | 20/344                         | 29/339               | 0.67 (0.38, 1.18)  | 175/4319                          | 215/4324             | 0.81 (0.66, 0.99)  | 0.53               |
| <b>SPS3</b>                                          | 11/114                         | 10/125               | 1.43 (0.61, 3.37)  | 49/1043                           | 56/1063              | 0.85 (0.58, 1.25)  | 0.28               |
| <b>UKPDS</b>                                         | 28/126                         | 14/61                | 0.93 (0.49, 1.76)  | 106/615                           | 66/315               | 0.83 (0.61, 1.13)  | 0.73               |

|                                  |          |          |                   |           |           |                   |      |
|----------------------------------|----------|----------|-------------------|-----------|-----------|-------------------|------|
| <b>Treatment Goal Trials</b>     | 66/687   | 63/623   | 0.83 (0.59, 1.18) | 395/7070  | 413/6818  | 0.84 (0.73, 0.96) | 0.85 |
| <b>HYVET</b>                     | 14/153   | 23/183   | 0.71 (0.37, 1.38) | 182/1780  | 212/1729  | 0.84 (0.69, 1.02) | 0.64 |
| <b>SHEP</b>                      | 37/279   | 29/275   | 1.40 (0.86, 2.28) | 173/2029  | 204/2019  | 0.83 (0.68, 1.02) | 0.06 |
| <b>SYST-EUR</b>                  | 11/180   | 17/153   | 0.55 (0.26, 1.18) | 126/2211  | 131/2144  | 0.93 (0.73, 1.19) | 0.21 |
| <b>TOMHS</b>                     | 1/47     | 0/12     | *                 | 5/621     | 3/222     | 0.59 (0.14, 2.48) | *    |
| <b>Placebo-Controlled Trials</b> | 63/659   | 69/623   | 0.89 (0.63, 1.26) | 486/6641  | 550/6114  | 0.80 (0.71, 0.90) | 0.57 |
| <b>All Trials</b>                | 129/1346 | 132/1246 | 0.87 (0.68, 1.11) | 881/13711 | 963/12932 | 0.82 (0.75, 0.90) | 0.76 |

Abbreviations: CI, confidence interval; HR, hazard ratio; Low/Act, randomized assignment of low blood pressure goal or active therapy; n represents number of events; N represents overall number of participants; Std/Pla, randomized assignment to standard blood pressure goal or placebo.

All models were unadjusted.

\*Could not be calculated due to small numbers.

**eTable 15. Treatment effects on cardiovascular disease or all-cause mortality by baseline standing hypotension, unadjusted**

| <b>Cardiovascular Disease or All-cause Mortality</b> |                      |                      |                                    |                      |                      |                                       |                      |
|------------------------------------------------------|----------------------|----------------------|------------------------------------|----------------------|----------------------|---------------------------------------|----------------------|
|                                                      | <b>n/N (Low/Act)</b> | <b>n/N (Std/Pla)</b> | <b>Hypotension<br/>HR (95% CI)</b> | <b>n/N (Low/Act)</b> | <b>n/N (Std/Pla)</b> | <b>No Hypotension<br/>HR (95% CI)</b> | <b>P-interaction</b> |
| <b>AASK</b>                                          | 37/38                | 46/46                | 0.82 (0.53, 1.27)                  | 465/500              | 474/505              | 0.97 (0.86, 1.11)                     | 0.46                 |
| <b>ACCORD</b>                                        | 8/49                 | 8/37                 | 0.72 (0.27, 1.91)                  | 57/609               | 72/626               | 0.81 (0.57, 1.15)                     | 0.81                 |
| <b>SPRINT</b>                                        | 59/361               | 65/357               | 0.89 (0.62, 1.26)                  | 377/4302             | 473/4306             | 0.79 (0.69, 0.90)                     | 0.55                 |
| <b>SPS3</b>                                          | 17/94                | 16/97                | 1.18 (0.59, 2.33)                  | 112/1063             | 139/1091             | 0.80 (0.62, 1.02)                     | 0.29                 |
| <b>UKPDS</b>                                         | 2/7                  | 1/8                  | 2.20 (0.20,24.33)                  | 186/734              | 122/368              | 0.74 (0.59, 0.93)                     | 0.29                 |
| <b>Treatment Goal Trials</b>                         | 123/549              | 136/545              | 0.89 (0.70, 1.14)                  | 1197/7208            | 1280/6896            | 0.79 (0.73, 0.86)                     | 0.35                 |
| <b>HYVET</b>                                         | 2/10                 | 1/12                 | 2.35 (0.21,25.89)                  | 221/1923             | 302/1900             | 0.72 (0.60, 0.85)                     | 0.31                 |
| <b>SHEP</b>                                          | 18/76                | 19/86                | 1.04 (0.55, 1.99)                  | 366/2232             | 464/2208             | 0.75 (0.66, 0.86)                     | 0.33                 |
| <b>SYST-EUR</b>                                      | 1/7                  | 4/8                  | 0.29 (0.03, 2.65)                  | 206/2384             | 247/2289             | 0.78 (0.65, 0.94)                     | 0.43                 |
| <b>TOMHS</b>                                         | 0/12                 | 0/2                  | *                                  | 34/656               | 17/232               | 0.69 (0.39, 1.24)                     | *                    |
| <b>Placebo-Controlled<br/>Trials</b>                 | 21/105               | 24/108               | 0.89 (0.50, 1.61)                  | 827/7195             | 1030/6629            | 0.72 (0.65, 0.78)                     | 0.43                 |
| <b>All Trials*</b>                                   | 144/654              | 160/653              | 0.89 (0.71, 1.12)                  | 2024/14403           | 2310/13525           | 0.77 (0.73, 0.82)                     | 0.27                 |
| <b>All-cause Mortality</b>                           |                      |                      |                                    |                      |                      |                                       |                      |
|                                                      | <b>n/N (Low/Act)</b> | <b>n/N (Std/Pla)</b> | <b>Hypotension<br/>HR (95% CI)</b> | <b>n/N (Low/Act)</b> | <b>n/N (Std/Pla)</b> | <b>No Hypotension<br/>HR (95% CI)</b> | <b>P-interaction</b> |
| <b>AASK</b>                                          | 2/38                 | 7/46                 | 0.32 (0.07, 1.53)                  | 43/500               | 54/505               | 0.78 (0.52, 1.16)                     | 0.29                 |
| <b>ACCORD</b>                                        | 4/49                 | 1/37                 | 2.64 (0.29,23.95)                  | 23/609               | 24/626               | 1.00 (0.56, 1.77)                     | 0.36                 |
| <b>SPRINT</b>                                        | 30/361               | 32/357               | 0.92 (0.56, 1.52)                  | 165/4302             | 212/4306             | 0.78 (0.63, 0.95)                     | 0.54                 |
| <b>SPS3</b>                                          | 7/94                 | 11/97                | 0.65 (0.25, 1.69)                  | 53/1063              | 55/1091              | 0.96 (0.66, 1.40)                     | 0.46                 |
| <b>UKPDS</b>                                         | 1/7                  | 1/8                  | 1.07 (0.07,17.12)                  | 133/734              | 79/368               | 0.84 (0.64, 1.11)                     | 0.72                 |
| <b>Treatment Goal Trials</b>                         | 44/549               | 52/545               | 0.83 (0.56, 1.24)                  | 417/7208             | 424/6896             | 0.84 (0.73, 0.96)                     | 0.99                 |
| <b>HYVET</b>                                         | 2/10                 | 1/12                 | 2.35 (0.21,25.89)                  | 194/1923             | 234/1900             | 0.82 (0.68, 0.99)                     | 0.37                 |
| <b>SHEP</b>                                          | 9/76                 | 11/86                | 0.95 (0.39, 2.30)                  | 201/2232             | 222/2208             | 0.89 (0.74, 1.08)                     | 0.92                 |

|                                         |        |        |                   |           |            |                   |      |
|-----------------------------------------|--------|--------|-------------------|-----------|------------|-------------------|------|
| <b>SYST-EUR</b>                         | 1/7    | 3/8    | 0.45 (0.05, 4.35) | 136/2384  | 145/2289   | 0.90 (0.71, 1.14) | 0.52 |
| <b>TOMHS</b>                            | 0/12   | 0/2    | *                 | 6/656     | 3/232      | 0.70 (0.18, 2.81) | *    |
| <b><i>Placebo-Controlled Trials</i></b> | 12/105 | 15/108 | 0.84 (0.40, 1.81) | 537/7195  | 604/6629   | 0.81 (0.72, 0.91) | 0.87 |
| <b><i>All Trials**</i></b>              | 56/654 | 67/653 | 0.83 (0.58, 1.19) | 954/14403 | 1028/13525 | 0.83 (0.76, 0.90) | 0.87 |

Abbreviations: CI, confidence interval; HR, hazard ratio; Low/Act, randomized assignment of low blood pressure goal or active therapy; n represents number of events; N represents overall number of participants; Std/Pla, randomized assignment to standard blood pressure goal or placebo.

Standing hypotension defined as SBP≤110 mm Hg or DBP≤60 mm Hg

All models were unadjusted.

**eTable 16. Treatment effects on cardiovascular disease or all-cause mortality by baseline orthostatic hypotension, adjusted for additional cardiovascular risk factors**

**Orthostatic Hypotension**

**Cardiovascular Disease or All-cause Mortality**

|                                  |                      |                      | <b>Orthostatic Hypotension</b>             |                      |                      | <b>No Orthostatic Hypotension</b>             |                      |
|----------------------------------|----------------------|----------------------|--------------------------------------------|----------------------|----------------------|-----------------------------------------------|----------------------|
|                                  | <b>n/N (Low/Act)</b> | <b>n/N (Std/Pla)</b> | <b>HR (95% CI)</b>                         | <b>n/N (Low/Act)</b> | <b>n/N (Std/Pla)</b> | <b>HR (95% CI)</b>                            | <b>P-interaction</b> |
| <b>AASK</b>                      | 45/47                | 51/53                | 0.92 (0.59, 1.44)                          | 455/489              | 469/498              | 0.96 (0.84, 1.09)                             | 0.89                 |
| <b>ACCORD</b>                    | 6/56                 | 9/45                 | 0.47 (0.17, 1.36)                          | 59/601               | 70/615               | 0.89 (0.63, 1.26)                             | 0.31                 |
| <b>SPRINT</b>                    | 40/343               | 51/332               | 0.78 (0.51, 1.18)                          | 392/4279             | 482/4274             | 0.79 (0.70, 0.91)                             | 0.93                 |
| <b>SPS3</b>                      | 16/89                | 19/110               | 1.25 (0.64, 2.45)                          | 103/897              | 124/914              | 0.80 (0.62, 1.04)                             | 0.24                 |
| <b>UKPDS</b>                     | 37/119               | 17/59                | 0.94 (0.52, 1.69)                          | 146/600              | 101/305              | 0.73 (0.56, 0.94)                             | 0.48                 |
| <b>Treatment Goal Trials</b>     | 144/654              | 147/599              | 0.88 (0.70, 1.11)                          | 1155/6866            | 1246/6606            | 0.85 (0.79, 0.92)                             | 0.79                 |
| <b>HVET</b>                      | 14/153               | 32/183               | 0.48 (0.25, 0.90)                          | 208/1776             | 271/1725             | 0.75 (0.62, 0.90)                             | 0.21                 |
| <b>SHEP</b>                      | 49/268               | 47/265               | 1.15 (0.77, 1.73)                          | 307/1940             | 417/1954             | 0.68 (0.59, 0.79)                             | 0.02                 |
| <b>SYST-EUR</b>                  | 21/178               | 24/153               | 0.74 (0.41, 1.33)                          | 181/2190             | 221/2126             | 0.74 (0.61, 0.90)                             | 0.97                 |
| <b>TOMHS</b>                     | 3/47                 | 2/12                 | 0.32 (0.04, 2.37)                          | 31/621               | 15/222               | 0.73 (0.40, 1.36)                             | 0.54                 |
| <b>Placebo-Controlled Trials</b> | 87/646               | 105/613              | 0.81 (0.61, 1.08)                          | 727/6527             | 924/6027             | 0.72 (0.65, 0.79)                             | 0.38                 |
| <b>All Trials</b>                | 231/1300             | 252/1212             | 0.85 (0.71, 1.02)                          | 1882/13393           | 2170/12633           | 0.80 (0.75, 0.85)                             | 0.52                 |
| <b>All-cause Mortality</b>       |                      |                      |                                            |                      |                      |                                               |                      |
|                                  | <b>n/N (Low/Act)</b> | <b>n/N (Std/Pla)</b> | <b>Orthostatic Hypotension HR (95% CI)</b> | <b>n/N (Low/Act)</b> | <b>n/N (Std/Pla)</b> | <b>No Orthostatic Hypotension HR (95% CI)</b> | <b>P-interaction</b> |
| <b>AASK</b>                      | 4/47                 | 8/53                 | 0.34 (0.09, 1.27)                          | 41/489               | 53/498               | 0.75 (0.49, 1.12)                             | 0.50                 |
| <b>ACCORD</b>                    | 3/56                 | 2/45                 | 0.73 (0.10, 5.20)                          | 24/601               | 23/615               | 1.12 (0.63, 1.99)                             | 0.99                 |
| <b>SPRINT</b>                    | 20/343               | 27/332               | 0.75 (0.42, 1.34)                          | 172/4279             | 213/4274             | 0.80 (0.66, 0.98)                             | 0.81                 |
| <b>SPS3</b>                      | 9/89                 | 9/110                | 1.54 (0.58, 4.08)                          | 47/897               | 50/914               | 0.88 (0.59, 1.31)                             | 0.23                 |
| <b>UKPDS</b>                     | 27/119               | 14/59                | 0.89 (0.46, 1.72)                          | 103/600              | 65/305               | 0.83 (0.60, 1.13)                             | 0.93                 |

|                           |          |          |                   |           |           |                   |      |
|---------------------------|----------|----------|-------------------|-----------|-----------|-------------------|------|
| <b>Treatment Goal</b>     |          |          |                   |           |           |                   |      |
| <b>Trials</b>             | 63/654   | 60/599   | 0.85 (0.59, 1.23) | 387/6866  | 404/6606  | 0.84 (0.73, 0.96) | 0.99 |
| <b>HYVET</b>              | 14/153   | 23/183   | 0.70 (0.36, 1.37) | 181/1776  | 212/1725  | 0.84 (0.69, 1.02) | 0.65 |
| <b>SHEP</b>               | 36/268   | 27/265   | 1.54 (0.93, 2.56) | 159/1940  | 194/1954  | 0.79 (0.64, 0.97) | 0.02 |
| <b>SYST-EUR</b>           | 11/178   | 17/153   | 0.57 (0.26, 1.24) | 121/2190  | 127/2126  | 0.86 (0.67, 1.11) | 0.32 |
| <b>TOMHS</b>              | 1/47     | 0/12     | *                 | 5/621     | 3/222     | 0.60 (0.14, 2.56) | *    |
| <b>Placebo-Controlled</b> |          |          |                   |           |           |                   |      |
| <b>Trials</b>             | 62/646   | 67/613   | 0.96 (0.68, 1.36) | 466/6527  | 536/6027  | 0.82 (0.72, 0.93) | 0.35 |
| <b>All Trials</b>         | 125/1300 | 127/1212 | 0.91 (0.71, 1.17) | 853/13393 | 940/12633 | 0.83 (0.76, 0.91) | 0.52 |

Abbreviations: CI, confidence interval; HR, hazard ratio; Low/Act, randomized assignment of low blood pressure goal or active therapy; n represents number of events; N represents overall number of participants; Std/Pla, randomized assignment to standard blood pressure goal or placebo.

\*Could not be calculated due to small numbers.

Cox proportional hazards models adjusted for age, sex, seated systolic blood pressure, seated diastolic blood pressure, eGFR<60 mL/min per 1.73 m<sup>2</sup>, body mass index, and diabetes status. Pooled estimates are additionally adjusted for study.

**eTable 17. Treatment effects on cardiovascular disease or all-cause mortality by baseline standing hypotension, adjusted for additional cardiovascular risk factors**

**Cardiovascular Disease or All-cause Mortality**

|                                  |               |               | Hypotension           |               |               | No Hypotension    |               |
|----------------------------------|---------------|---------------|-----------------------|---------------|---------------|-------------------|---------------|
|                                  | n/N (Low/Act) | n/N (Std/Pla) | HR (95% CI)           | n/N (Low/Act) | n/N (Std/Pla) | HR (95% CI)       | P-interaction |
| <b>AASK</b>                      | 37/38         | 46/46         | 0.91 (0.57, 1.46)     | 463/498       | 474/505       | 0.97 (0.86, 1.11) | 0.45          |
| <b>ACCORD</b>                    | 8/49          | 8/37          | 0.67 (0.25, 1.86)     | 57/608        | 71/623        | 0.84 (0.59, 1.19) | 0.95          |
| <b>SPRINT</b>                    | 59/360        | 65/353        | 0.86 (0.60, 1.22)     | 373/4262      | 468/4253      | 0.78 (0.68, 0.90) | 0.65          |
| <b>SPS3</b>                      | 16/78         | 12/84         | 1.26 (0.59, 2.71)     | 103/908       | 131/940       | 0.79 (0.61, 1.03) | 0.13          |
| <b>UKPDS</b>                     | 2/7           | 1/8           | *                     | 181/712       | 117/356       | 0.75 (0.60, 0.95) | 0.42          |
| <b>Treatment Goal Trials</b>     | 122/532       | 132/528       | 0.95 (0.74, 1.22)     | 1177/6988     | 1261/6677     | 0.85 (0.78, 0.92) | 0.43          |
| <b>HYVET</b>                     | 2/10          | 1/12          | 97.19 (0.02, 4.4e+05) | 220/1919      | 302/1896      | 0.72 (0.60, 0.85) | 0.37          |
| <b>SHEP</b>                      | 18/76         | 19/84         | 1.07 (0.55, 2.08)     | 338/2132      | 445/2135      | 0.71 (0.62, 0.82) | 0.36          |
| <b>SYST-EUR</b>                  | 1/7           | 4/8           | *                     | 201/2361      | 241/2271      | 0.74 (0.61, 0.89) | 0.53          |
| <b>TOMHS</b>                     | 0/12          | 0/2           | *                     | 34/656        | 17/232        | 0.70 (0.39, 1.25) | *             |
| <b>Placebo-Controlled Trials</b> | 21/105        | 24/106        | 0.99 (0.55, 1.80)     | 793/7068      | 1005/6534     | 0.72 (0.66, 0.80) | 0.42          |
| <b>All Trials*</b>               | 143/637       | 156/634       | 0.94 (0.75, 1.18)     | 1970/14056    | 2266/13211    | 0.79 (0.75, 0.84) | 0.14          |
| <b>All-cause Mortality</b>       |               |               |                       |               |               |                   |               |
|                                  |               |               | Hypotension           |               |               | No Hypotension    |               |
|                                  | n/N (Low/Act) | n/N (Std/Pla) | HR (95% CI)           | n/N (Low/Act) | n/N (Std/Pla) | HR (95% CI)       | P-interaction |
| <b>AASK</b>                      | 2/38          | 7/46          | 0.36 (0.05, 2.72)     | 43/498        | 54/505        | 0.75 (0.50, 1.12) | 0.44          |
| <b>ACCORD</b>                    | 4/49          | 1/37          | 2.35 (0.23, 23.71)    | 23/608        | 24/623        | 1.05 (0.59, 1.86) | 0.35          |
| <b>SPRINT</b>                    | 30/360        | 32/353        | 0.92 (0.56, 1.51)     | 162/4262      | 208/4253      | 0.78 (0.63, 0.96) | 0.61          |
| <b>SPS3</b>                      | 6/78          | 9/84          | 0.45 (0.15, 1.36)     | 50/908        | 50/940        | 0.98 (0.66, 1.45) | 0.42          |
| <b>UKPDS</b>                     | 1/7           | 1/8           | *                     | 129/712       | 78/356        | 0.83 (0.63, 1.11) | 0.91          |
| <b>Treatment Goal Trials</b>     | 43/532        | 50/528        | 0.85 (0.57, 1.29)     | 407/6988      | 414/6677      | 0.84 (0.73, 0.96) | 0.96          |
| <b>HYVET</b>                     | 2/10          | 1/12          | 97.19 (0.02, 4.4e+05) | 193/1919      | 234/1896      | 0.82 (0.68, 1.00) | 0.42          |
| <b>SHEP</b>                      | 9/76          | 11/84         | 0.85 (0.35, 2.07)     | 186/2132      | 210/2135      | 0.87 (0.72, 1.06) | 0.93          |

|                                  |        |        |                   |           |            |                   |      |
|----------------------------------|--------|--------|-------------------|-----------|------------|-------------------|------|
| <b>SYST-EUR</b>                  | 1/7    | 3/8    | *                 | 131/2361  | 141/2271   | 0.83 (0.65, 1.05) | 0.26 |
| <b>TOMHS</b>                     | 0/12   | 0/2    | *                 | 6/656     | 3/232      | 0.71 (0.18, 2.88) | *    |
| <b>Placebo-Controlled Trials</b> | 12/105 | 15/106 | 0.93 (0.43, 2.02) | 516/7068  | 588/6534   | 0.84 (0.74, 0.94) | 0.88 |
| <b>All Trials**</b>              | 55/637 | 65/634 | 0.83 (0.58, 1.19) | 923/14056 | 1002/13211 | 0.84 (0.77, 0.92) | 0.88 |

Abbreviations: CI, confidence interval; HR, hazard ratio; Low/Act, randomized assignment of low blood pressure goal or active therapy; n represents number of events; N represents overall number of participants; Std/Pla, randomized assignment to standard blood pressure goal or placebo.

Standing hypotension defined as SBP $\leq$ 110 mm Hg or DBP $\leq$ 60 mm Hg

Cox proportional hazards models adjusted for age, sex, seated systolic blood pressure, seated diastolic blood pressure, eGFR $<$ 60 mL/min per 1.73 m<sup>2</sup>, body mass index, and diabetes status. Pooled estimates are additionally adjusted for study.



**eTable 18. Association of baseline orthostatic hypotension with cardiovascular disease or all-cause mortality, using an alternate definition of orthostatic hypotension based on a drop in systolic blood pressure of at least 30 mm Hg or a drop in diastolic blood pressure of at least 10 mm Hg**

| Cardiovascular disease or all-cause mortality | Baseline Orthostatic Hypotension (Using Alternate Definition) |                                 |                    |        |
|-----------------------------------------------|---------------------------------------------------------------|---------------------------------|--------------------|--------|
|                                               | Orthostatic hypotension, n/N                                  | No orthostatic hypotension, n/N | HR (95% CI)        | P      |
| AASK                                          | 71/74                                                         | 951/1015                        | 1.17 (0.92, 1.49)  | 0.20   |
| ACCORD                                        | 10/71                                                         | 135/1250                        | 1.29 (0.68, 2.45)  | 0.44   |
| SPRINT                                        | 56/393                                                        | 918/8933                        | 1.34 (1.02, 1.76)  | 0.03   |
| SPS3                                          | 29/169                                                        | 255/2176                        | 1.56 (1.06, 2.29)  | 0.02   |
| UKPDS                                         | 36/116                                                        | 275/1001                        | 1.09 (0.77, 1.55)  | 0.62   |
| <i>Treatment Goal Trials</i>                  | 202/823                                                       | 2534/14375                      | 1.28 (1.10, 1.47)  | <0.001 |
| <br>                                          |                                                               |                                 |                    |        |
| HYVET                                         | 38/246                                                        | 488/3599                        | 1.15 (0.82, 1.59)  | 0.42   |
| SHEP                                          | 53/254                                                        | 814/4348                        | 1.07 (0.81, 1.41)  | 0.63   |
| SYST-EUR                                      | 16/91                                                         | 442/4597                        | 1.50 (0.91, 2.47)  | 0.11   |
| TOMHS                                         | 4/37                                                          | 47/865                          | 2.04 (0.73, 5.67)  | 0.17   |
| <i>Placebo-controlled Trials</i>              | 111/628                                                       | 1791/13409                      | 1.16 (0.96, 1.41)  | 0.13   |
| <br>                                          |                                                               |                                 |                    |        |
| <i>All Trials*</i>                            | 313/1451                                                      | 4325/27784                      | 1.23 (1.10, 1.38)  | <0.001 |
| <br>                                          |                                                               |                                 |                    |        |
| All-Cause Mortality                           | Baseline Orthostatic Hypotension (Using Alternate Definition) |                                 |                    |        |
|                                               | Orthostatic hypotension, n/N                                  | No orthostatic hypotension, n/N | HR (95% CI)        | P      |
| AASK                                          | 8/74                                                          | 98/1015                         | 1.17 (0.57, 2.41)  | 0.66   |
| ACCORD                                        | 3/71                                                          | 49/1250                         | 1.07 (0.33, 3.45)  | 0.90   |
| SPRINT                                        | 26/393                                                        | 413/8933                        | 1.29 (0.87, 1.92)  | 0.20   |
| SPS3                                          | 15/169                                                        | 111/2176                        | 1.93 (1.12, 3.31)  | 0.02   |
| UKPDS                                         | 29/116                                                        | 185/1001                        | 1.31 (0.88, 1.93)  | 0.18   |
| <i>Treatment Goal Trials</i>                  | 81/823                                                        | 856/14375                       | 1.37 (1.09, 1.73)  | 0.007  |
| <br>                                          |                                                               |                                 |                    |        |
| HYVET                                         | 31/246                                                        | 400/3599                        | 1.14 (0.79, 1.64)  | 0.48   |
| SHEP                                          | 37/254                                                        | 406/4348                        | 1.54 (1.10, 2.16)  | 0.01   |
| SYST-EUR                                      | 12/91                                                         | 273/4597                        | 1.81 (1.01, 3.23)  | 0.05   |
| TOMHS                                         | 1/37                                                          | 8/865                           | 2.99 (0.37, 23.96) | 0.30   |
| <i>Placebo-controlled Trials</i>              | 81/628                                                        | 1087/13409                      | 1.37 (1.09, 1.72)  | 0.007  |
| <br>                                          |                                                               |                                 |                    |        |
| <i>All Trials**</i>                           | 162/1451                                                      | 1943/27784                      | 1.37 (1.17, 1.61)  | <0.001 |

Abbreviations: CVD, cardiovascular disease; CI, confidence interval; HR, hazard ratio; n represents number of events; N represents overall number of participants.

Cox proportional hazards models adjusted for age, sex, and study (as a categorical variable).

There was no evidence for an interaction by treatment arm for individual studies or pooled study groupings.

**eTable 19. Treatment effects on cardiovascular disease or all-cause mortality by baseline orthostatic hypotension, using an alternate definition of orthostatic hypotension based on a drop in systolic blood pressure of at least 30 mm Hg or a drop in diastolic blood pressure of at least 10 mm Hg**

| Cardiovascular Disease or All-cause Mortality | Orthostatic Hypotension |               |                   | No Orthostatic Hypotension |               |                   | <i>P</i> -interaction |
|-----------------------------------------------|-------------------------|---------------|-------------------|----------------------------|---------------|-------------------|-----------------------|
|                                               | n/N (Low/Act)           | n/N (Std/Pla) | HR (95% CI)       | n/N (Low/Act)              | n/N (Std/Pla) | HR (95% CI)       |                       |
| <b>Treatment Goal Trials</b>                  | 102/433                 | 100/390       | 0.88 (0.66, 1.16) | 1218/7324                  | 1316/7051     | 0.85 (0.79, 0.92) | 0.88                  |
| <b>Placebo-Controlled Trials</b>              | 50/311                  | 61/317        | 0.87 (0.59, 1.26) | 798/6989                   | 993/6420      | 0.74 (0.67, 0.81) | 0.33                  |
| <b>All Trials</b>                             | 152/744                 | 161/707       | 0.88 (0.70, 1.10) | 2016/14313                 | 2309/13471    | 0.81 (0.76, 0.86) | 0.45                  |
| <b>All-cause Mortality</b>                    |                         |               |                   |                            |               |                   |                       |
| <b>Treatment Goal Trials</b>                  | 44/433                  | 37/390        | 1.03 (0.66, 1.62) | 417/7324                   | 439/7051      | 0.82 (0.72, 0.94) | 0.44                  |
| <b>Placebo-Controlled Trials</b>              | 35/311                  | 46/317        | 0.84 (0.54, 1.31) | 514/6989                   | 573/6420      | 0.85 (0.76, 0.96) | 0.94                  |
| <b>All Trials</b>                             | 79/744                  | 83/707        | 0.93 (0.68, 1.27) | 931/14313                  | 1012/13471    | 0.84 (0.77, 0.92) | 0.56                  |

Abbreviations: CI, confidence interval; HR, hazard ratio; Low/Act, randomized assignment of low blood pressure goal or active therapy; n represents number of events; N represents overall number of participants; Std/Pla, randomized assignment to standard blood pressure goal or placebo.

All models were adjusted for age and sex. Pooled estimates are adjusted for age, sex, and study (as a categorical variable).

**eTable 20. Treatment effects on cardiovascular disease or all-cause mortality by baseline standing hypotension, defined using distinct thresholds for systolic or diastolic blood pressure**

| Standing systolic blood pressure with threshold of 110 mm Hg |                         |               |                   |                         |               |                   |               |
|--------------------------------------------------------------|-------------------------|---------------|-------------------|-------------------------|---------------|-------------------|---------------|
|                                                              | Standing SBP ≤110 mm Hg |               |                   | Standing SBP >110 mm Hg |               |                   |               |
|                                                              | n/N (Low/Act)           | n/N (Std/Pla) | HR (95% CI)       | n/N (Low/Act)           | n/N (Std/Pla) | HR (95% CI)       | P-interaction |
| <b>Cardiovascular Disease or Mortality</b>                   |                         |               |                   |                         |               |                   |               |
| Treatment Goal Trials                                        | 65/305                  | 83/308        | 0.80 (0.58, 1.11) | 1255/7452               | 1333/7133     | 0.86 (0.79, 0.93) | 0.80          |
| Placebo-Controlled Trials                                    | 0/13                    | 0/2           | *                 | 848/7287                | 1054/6735     | 0.74 (0.68, 0.81) | *             |
| All Trials                                                   | 65/318                  | 83/310        | 0.80 (0.58, 1.11) | 2103/14739              | 2387/13868    | 0.81 (0.76, 0.86) | 1.00          |
| <b>All-cause Mortality</b>                                   |                         |               |                   |                         |               |                   |               |
| Treatment Goal Trials                                        | 14/305                  | 27/308        | 0.52 (0.27, 0.99) | 447/7452                | 449/7133      | 0.85 (0.75, 0.97) | 0.17          |
| Placebo-Controlled Trials                                    | 0/13                    | 0/2           | *                 | 549/7287                | 619/6735      | 0.85 (0.76, 0.96) | *             |
| All Trials                                                   | 14/318                  | 27/310        | 0.52 (0.27, 0.99) | 996/14739               | 1068/13868    | 0.85 (0.78, 0.93) | 0.15          |
| Standing systolic blood pressure with threshold of 100 mm Hg |                         |               |                   |                         |               |                   |               |
|                                                              | Standing SBP ≤100 mm Hg |               |                   | Standing SBP >100 mm Hg |               |                   |               |
|                                                              |                         |               | HR (95% CI)       |                         |               | HR (95% CI)       | P-interaction |
| <b>Cardiovascular Disease or Mortality</b>                   |                         |               |                   |                         |               |                   |               |
| Treatment Goal Trials                                        | 12/70                   | 20/68         | 0.41 (0.19, 0.89) | 1308/7687               | 1396/7373     | 0.86 (0.80, 0.93) | 0.19          |
| Placebo-Controlled Trials                                    | 0/1                     | 0/1           | *                 | 848/7299                | 1054/6736     | 0.74 (0.68, 0.81) | *             |
| All Trials                                                   | 12/71                   | 20/69         | 0.41 (0.19, 0.89) | 2156/14986              | 2450/14109    | 0.81 (0.77, 0.86) | 0.31          |
| <b>All-cause Mortality</b>                                   |                         |               |                   |                         |               |                   |               |
| Treatment Goal Trials                                        | 3/70                    | 5/68          | 0.29 (0.06, 1.51) | 458/7687                | 471/7373      | 0.84 (0.74, 0.95) | 0.64          |
| Placebo-Controlled Trials                                    | 0/1                     | 0/1           | *                 | 549/7299                | 619/6736      | 0.85 (0.76, 0.95) | *             |
| All Trials                                                   | 3/71                    | 5/69          | 0.29 (0.06, 1.51) | 1007/14986              | 1090/14109    | 0.85 (0.78, 0.92) | 0.65          |
| Standing diastolic blood pressure with threshold of 60 mm Hg |                         |               |                   |                         |               |                   |               |
|                                                              | Standing DBP ≤60 mm Hg  |               |                   | Standing DBP >60 mm Hg  |               |                   |               |
|                                                              |                         |               | HR (95% CI)       |                         |               | HR (95% CI)       | P-interaction |
| <b>Cardiovascular Disease or Mortality</b>                   |                         |               |                   |                         |               |                   |               |
| Treatment Goal Trials                                        | 68/330                  | 73/314        | 1.00 (0.71, 1.40) | 1252/7427               | 1343/7127     | 0.85 (0.79, 0.92) | 0.30          |
| Placebo-Controlled Trials                                    | 21/92                   | 24/106        | 1.02 (0.57, 1.85) | 827/7208                | 1030/6631     | 0.74 (0.67, 0.81) | 0.22          |
| All Trials                                                   | 89/422                  | 97/420        | 1.00 (0.75, 1.34) | 2079/14635              | 2373/13758    | 0.80 (0.76, 0.85) | 0.10          |

|                                                                     |        |        |                                   |            |            |                                      |                      |
|---------------------------------------------------------------------|--------|--------|-----------------------------------|------------|------------|--------------------------------------|----------------------|
| <b>All-cause Mortality</b>                                          |        |        |                                   |            |            |                                      |                      |
| <b>Treatment Goal Trials</b>                                        | 33/330 | 29/314 | 1.26 (0.76, 2.10)                 | 428/7427   | 447/7127   | 0.82 (0.71, 0.93)                    | 0.15                 |
| <b>Placebo-Controlled Trials</b>                                    | 12/92  | 15/106 | 0.96 (0.44, 2.06)                 | 537/7208   | 604/6631   | 0.85 (0.75, 0.95)                    | 0.62                 |
| <b>All Trials</b>                                                   | 45/422 | 44/420 | 1.18 (0.77, 1.81)                 | 965/14635  | 1051/13758 | 0.84 (0.77, 0.91)                    | 0.15                 |
| <b>Standing diastolic blood pressure with threshold of 50 mm Hg</b> |        |        |                                   |            |            |                                      |                      |
|                                                                     |        |        | <b>Standing DBP ≤50<br/>mm Hg</b> |            |            | <b>Standing DBP<br/>&gt;50 mm Hg</b> |                      |
| <b>Cardiovascular Disease or Mortality</b>                          |        |        | <b>HR (95% CI)</b>                |            |            | <b>HR (95% CI)</b>                   | <b>P-interaction</b> |
| <b>Treatment Goal Trials</b>                                        | 8/44   | 13/46  | 0.71 (0.28, 1.79)                 | 1312/7713  | 1403/7395  | 0.86 (0.80, 0.93)                    | 0.28                 |
| <b>Placebo-Controlled Trials</b>                                    | 5/22   | 5/18   | 1.07 (0.28, 4.05)                 | 843/7278   | 1049/6719  | 0.74 (0.68, 0.81)                    | 0.71                 |
| <b>All Trials</b>                                                   | 13/66  | 18/64  | 0.76 (0.36, 1.58)                 | 2155/14991 | 2452/14114 | 0.81 (0.77, 0.86)                    | 0.46                 |
| <b>All-cause Mortality</b>                                          |        |        |                                   |            |            |                                      |                      |
| <b>Treatment Goal Trials</b>                                        | 6/44   | 5/46   | 1.53 (0.42, 5.60)                 | 455/7713   | 471/7395   | 0.83 (0.73, 0.95)                    | 0.61                 |
| <b>Placebo-Controlled Trials</b>                                    | 4/22   | 2/18   | 2.54 (0.38, 17.05)                | 545/7278   | 617/6719   | 0.85 (0.75, 0.95)                    | 0.24                 |
| <b>All Trials</b>                                                   | 10/66  | 7/64   | 1.87 (0.66, 5.30)                 | 1000/14991 | 1088/14114 | 0.84 (0.77, 0.92)                    | 0.28                 |

Abbreviations: CI, confidence interval; HR, hazard ratio; Low/Act, randomized assignment of low blood pressure goal or active therapy; n represents number of events; N represents overall number of participants; Std/Pla, randomized assignment to standard blood pressure goal or placebo.

All models were adjusted for age and sex. Pooled estimates are adjusted for age, sex, and study (as a categorical variable).

\*Numbers too few to calculate

**eTable 21. Treatment effects among participants with baseline orthostatic hypotension or baseline standing hypotension in strata of baseline characteristics**

|                                                     |          | Cardiovascular Disease or All-cause Mortality |               |          | All-Cause Mortality |               |  |
|-----------------------------------------------------|----------|-----------------------------------------------|---------------|----------|---------------------|---------------|--|
|                                                     | n/N      | HR (95% CI)                                   | P-interaction | n/N      | HR (95% CI)         | P-interaction |  |
| <b>Orthostatic hypotension</b>                      |          |                                               |               |          |                     |               |  |
| <b>Age</b>                                          |          |                                               |               |          |                     |               |  |
| ≤75 years                                           | 329/1719 | 0.86 (0.69, 1.08)                             | 0.67          | 140/1719 | 1.04 (0.74, 1.46)   | 0.36          |  |
| >75 years                                           | 172/873  | 0.77 (0.56, 1.04)                             |               | 121/873  | 0.80 (0.56, 1.15)   |               |  |
| <b>Sex</b>                                          |          |                                               |               |          |                     |               |  |
| Men                                                 | 288/1280 | 0.78 (0.62, 0.99)                             | 0.49          | 144/1280 | 0.81 (0.58, 1.13)   | 0.44          |  |
| Women                                               | 213/1312 | 0.92 (0.70, 1.21)                             |               | 117/1312 | 1.05 (0.73, 1.52)   |               |  |
| <b>Pre-randomization SBP ≥140 or DBP ≥90 mm Hg*</b> |          |                                               |               |          |                     |               |  |
| No                                                  | 31/128   | 0.68 (0.32, 1.45)                             | 0.74          | 9/128    | 0.40 (0.09, 1.89)   | 0.42          |  |
| Yes                                                 | 470/2464 | 0.84 (0.70, 1.01)                             |               | 252/2464 | 0.94 (0.73, 1.21)   |               |  |
| <b>Diabetes</b>                                     |          |                                               |               |          |                     |               |  |
| No                                                  | 374/2053 | 0.84 (0.68, 1.03)                             | 0.99          | 179/2053 | 0.91 (0.67, 1.22)   | 0.91          |  |
| Yes                                                 | 127/539  | 0.85 (0.59, 1.21)                             |               | 82/539   | 0.95 (0.61, 1.49)   |               |  |
| <b>Stage III chronic kidney disease*</b>            |          |                                               |               |          |                     |               |  |
| ≥60 mL/min per 1.73 m <sup>2</sup>                  | 348/1839 | 0.83 (0.67, 1.03)                             | 0.98          | 198/1839 | 0.89 (0.67, 1.18)   | 0.62          |  |
| <60 mL/min per 1.73 m <sup>2</sup>                  | 148/734  | 0.83 (0.60, 1.15)                             |               | 61/734   | 0.97 (0.58, 1.62)   |               |  |
| <b>Body Mass Index</b>                              |          |                                               |               |          |                     |               |  |
| <30 kg/m <sup>2</sup>                               | 241/1686 | 0.83 (0.64, 1.07)                             | 0.62          | 124/1686 | 0.94 (0.65, 1.34)   | 0.95          |  |
| ≥30 kg/m <sup>2</sup>                               | 247/845  | 0.87 (0.67, 1.12)                             |               | 130/845  | 0.91 (0.64, 1.29)   |               |  |
| <b>Standing hypotension</b>                         |          |                                               |               |          |                     |               |  |
| <b>Age</b>                                          |          |                                               |               |          |                     |               |  |
| ≤75 years                                           | 193/828  | 0.90 (0.67, 1.19)                             | 0.99          | 62/828   | 0.75 (0.45, 1.25)   | 0.59          |  |
| >75 years                                           | 111/479  | 0.89 (0.61, 1.30)                             |               | 61/479   | 0.92 (0.55, 1.52)   |               |  |
| <b>Sex</b>                                          |          |                                               |               |          |                     |               |  |

|                                                                                     |          |                   |      |         |                   |      |
|-------------------------------------------------------------------------------------|----------|-------------------|------|---------|-------------------|------|
| Men                                                                                 | 193/744  | 0.95 (0.71, 1.26) | 0.85 | 80/744  | 0.86 (0.55, 1.35) | 0.68 |
| Women                                                                               | 111/563  | 0.97 (0.66, 1.41) |      | 43/563  | 1.01 (0.55, 1.86) |      |
| <b>Pre-randomization SBP <math>\geq</math>140 or DBP <math>\geq</math>90 mm Hg*</b> |          |                   |      |         |                   |      |
| No                                                                                  | 138/633  | 0.88 (0.62, 1.23) | 0.66 | 40/633  | 0.60 (0.31, 1.15) | 0.12 |
| Yes                                                                                 | 166/674  | 0.99 (0.73, 1.35) |      | 83/674  | 1.06 (0.68, 1.64) |      |
| <b>Diabetes</b>                                                                     |          |                   |      |         |                   |      |
| No                                                                                  | 254/1075 | 0.95 (0.74, 1.22) | 0.78 | 98/1075 | 0.94 (0.63, 1.40) | 0.55 |
| Yes                                                                                 | 50/232   | 1.01 (0.56, 1.80) |      | 25/232  | 0.82 (0.36, 1.88) |      |
| <b>Stage III chronic kidney disease*</b>                                            |          |                   |      |         |                   |      |
| $\geq$ 60 mL/min per 1.73 m <sup>2</sup>                                            | 204/874  | 0.98 (0.74, 1.29) | 0.45 | 94/874  | 0.86 (0.57, 1.29) | 0.95 |
| <60 mL/min per 1.73 m <sup>2</sup>                                                  | 100/428  | 0.84 (0.56, 1.26) |      | 29/428  | 0.91 (0.44, 1.92) |      |
| <b>Body Mass Index</b>                                                              |          |                   |      |         |                   |      |
| <30 kg/m <sup>2</sup>                                                               | 124/765  | 1.11 (0.78, 1.58) | 0.23 | 52/765  | 0.97 (0.56, 1.68) | 0.66 |
| $\geq$ 30 kg/m <sup>2</sup>                                                         | 175/511  | 0.84 (0.62, 1.14) |      | 68/511  | 0.81 (0.50, 1.31) |      |

Abbreviations: CI, confidence interval; DBP, diastolic blood pressure; n, the number of events; HR, hazard ratio; N, the number at risk; SBP, systolic blood pressure

\*Based on the CKD EPI 2021 race-free, creatinine equation. eGFR was not available from UKPDS or SHEP. UKPDS provided stage III CKD categories based on the 2021 CKD-EPI race-free, creatinine equation. For SHEP we relied on a self-reported history of kidney disease.
