# Supplementary material
Source: PubMed Central journal article supplement (PMC10582789)
Supplement: jama-e2318497-s002.pdf [file jama-e2318497-s002.pdf]

Juraschek SP, Hu J, Cluett JL, et al. Orthostatic hypotension, hypertension treatment, and cardiovascular disease: an individual participant meta-analysis. *JAMA*. Published online October 17, 2023. doi:10.1001/jama.2023.18497

## **Data Sharing Statement**

### **Data**

**Data available:** No

### **Additional Information**

**Explanation for why data not available:** Trial data was obtained with permission by contacting the original trial principal investigators or with an approved proposal via the NHLBI BioLincc Repository.
